# Supplementary material for: Let’s talk numbers: a qualitative study of community-dwelling US adults to understand the role of numeracy in the management of heart failure
Source: PubMed Central journal article supplement — BMJ Open. 2018 Sep 19;8(9):e023073. doi: 10.1136/bmjopen-2018-023073 (PMC6150136; doi:10.1136/bmjopen-2018-023073), 2018-09-19
Supplement: bmjopen-2018-023073.draft_revisions.pdf [file bmjopen-2018-023073.draft_revisions.pdf]

# BMJ Open

BMJ Open is committed to open peer review. As part of this commitment we make the peer review history of every article we publish publicly available.

When an article is published we post the peer reviewers' comments and the authors' responses online. We also post the versions of the paper that were used during peer review. These are the versions that the peer review comments apply to.

The versions of the paper that follow are the versions that were submitted during the peer review process. They are not the versions of record or the final published versions. They should not be cited or distributed as the published version of this manuscript.

BMJ Open is an open access journal and the full, final, typeset and author-corrected version of record of the manuscript is available on our site with no access controls, subscription charges or pay-per-view fees (<http://bmjopen.bmj.com>).

If you have any questions on BMJ Open's open peer review process please email [editorial.bmjopen@bmj.com](mailto:editorial.bmjopen@bmj.com)

# BMJ Open

## Let's Talk Numbers – A Qualitative Study to Understand the Role of Numeracy in the Management of Heart Failure

|                               |                                                                                                                                                                                                                                                                                                                                                                                                                                                                                                             |
|-------------------------------|-------------------------------------------------------------------------------------------------------------------------------------------------------------------------------------------------------------------------------------------------------------------------------------------------------------------------------------------------------------------------------------------------------------------------------------------------------------------------------------------------------------|
| Journal:                      | <i>BMJ Open</i>                                                                                                                                                                                                                                                                                                                                                                                                                                                                                             |
| Manuscript ID                 | bmjopen-2018-023073                                                                                                                                                                                                                                                                                                                                                                                                                                                                                         |
| Article Type:                 | Research                                                                                                                                                                                                                                                                                                                                                                                                                                                                                                    |
| Date Submitted by the Author: | 21-Mar-2018                                                                                                                                                                                                                                                                                                                                                                                                                                                                                                 |
| Complete List of Authors:     | Sterling, Madeline; Cornell University Joan and Sanford I Weill Medical College<br>Silva, Ariel; Cornell University Joan and Sanford I Weill Medical College<br>Robbins, Laura; Hospital for Special Surgery<br>Dargar, Savira; Cornell University Joan and Sanford I Weill Medical College<br>Schapira, Marilyn; University of Pennsylvania Perelman School of Medicine;<br>Corporal Michael J Crescenzo VA Medical Center<br>Safford, Monika; Cornell University Joan and Sanford I Weill Medical College |
| Keywords:                     | Heart failure < CARDIOLOGY, health numeracy, QUALITATIVE RESEARCH, PRIMARY CARE, health communication                                                                                                                                                                                                                                                                                                                                                                                                       |
|                               |                                                                                                                                                                                                                                                                                                                                                                                                                                                                                                             |

SCHOLARONE™  
Manuscripts

**Title:** Let's Talk Numbers – A Qualitative Study to Understand the Role of Numeracy in the Management of Heart Failure

**Author(s):** Madeline R. Sterling<sup>1</sup>, M.D., M.P.H., Ariel F. Silva<sup>1</sup>, N.P., Laura Robbins<sup>2</sup>, D.S.W., Savira K. Dargar<sup>1</sup>, M.S., Marilyn M. Schapira<sup>3,4</sup>, M.D., M.P.H., Monika M. Safford<sup>1</sup>, M.D.

**Author Affiliations:**

1. Division of General Internal Medicine, Department of Medicine, Weill Cornell Medical College, New York, NY
2. Hospital for Special Surgery, Education and Academic Affairs, New York, NY
3. Department of Medicine, Perelman School of Medicine, University of Pennsylvania, Philadelphia, PA.
4. Crescenz VA Medical Center, Philadelphia, PA.

**Corresponding Author:**

Madeline R. Sterling, M.D., M.P.H.  
AHRQ Health Services Research Fellow  
Division of General Internal Medicine, Department of Medicine  
Weill Cornell Medical College  
1300 York Avenue, P.O. Box 46  
New York, N.Y. 10065  
Phone: 646-962-5029  
Fax: 646-962-4610  
Email : mrs9012@med.cornell.edu  
Twitter: @mad\_sters

**Funding:** Dr. Sterling is supported by T32HS000066 from the Agency for Healthcare Research and Quality. The content is solely the responsibility of the authors and does not necessarily represent the official views of the Agency for Healthcare Research and Quality.

**Abstract word count:** 275

**Manuscript word count:** 3,960

**Tables:** 1

**Figures:** 1

**Supplemental Figures:** 3

**COREQ Checklist** (to assess quality of qualitative studies) **included**

**Keywords:** heart failure, health numeracy, chronic disease management, qualitative study, health services research

## Abstract

**Objective:** To examine the perspectives of adults with heart failure (HF) about numerical concepts integral to HF self-care.

**Setting:** This qualitative study took place at an urban academic primary care practice.

**Participants:** Thirty men and women aged 47 to 89 years with a history of HF were recruited to participate. Eligibility criteria included: a history of HF ( $\geq 1$  year), seen at the clinic within the last year, and a HF hospitalization within the last 6 months. Non-English speakers and those with severe cognitive impairment were excluded.

**Methods:** In-depth semi-structured interviews were conducted. Participants were interviewed about numeracy across three domains of HF self-care: 1) monitoring weight; 2) maintaining a diet low in salt; and 3) monitoring blood pressure. Interviews were audiotaped, transcribed verbatim, and analyzed using grounded theory and word cloud techniques.

**Results:** Five key themes reflecting participants' attitudes towards numerical concepts pertaining to weight, diet, and blood pressure were identified: (1) Communication between healthcare providers and patients is a complex, multi-stage process (2) Patients possess a wide range of knowledge and understanding (3) Social and caregiver support is critical for the application of numerical concepts (4) Prior health experiences shape outlook towards numerical concepts and instructions (5) Fear serves as a barrier and a facilitator to carrying out HF self-care tasks that involve numbers. The findings informed a theoretical framework of health numeracy in HF.

**Conclusion:** Many HF patients lack basic understanding and skills of numeracy required for adequate self-care. In addition, they rely on caregivers who may lack training in HF self-care. Patient-provider communication and HF-specific training of caregivers may be more important influences on successful HF self-care than individual patient numeracy.

### Strengths and Limitations

- This is the first study to examine heart failure (HF) patients' perspectives towards numerical concepts of HF self-care and significantly adds to the literature.
- The findings have direct implications for clinical care.
- A purposive sampling strategy was used to recruit a diverse group of patients, which is more methodologically rigorous than convenience sampling, a method used by many qualitative studies.
- Interviews were thoroughly analyzed using a grounded theory approach.
- The study is limited in generalizability due to its qualitative nature and small sample size.

## Introduction

There are 1 million heart failure (HF) hospitalizations each year and 25% of patients admitted for HF are readmitted within 30 days.<sup>1,2</sup> Part of this unplanned healthcare utilization is thought to be preventable by improved HF self-care.<sup>3</sup> Prior studies have found social and cognitive factors to be associated with HF self-care, including health literacy,<sup>4</sup> HF knowledge,<sup>5,6</sup> social support,<sup>7,8</sup> and cognitive impairment.<sup>9,10</sup> Yet, little is known about health numeracy in the context of HF.<sup>11,12</sup>

Health numeracy is the ability to access, understand, and apply numerical data to health-related decisions.<sup>13</sup> Although poor numeracy skills can coexist with low health literacy, numeracy and literacy measure different constructs and many adults tend to have worse quantitative skills.<sup>13-16</sup> With respect to chronic diseases, low numeracy is associated with worse glycemic control among adults with diabetes,<sup>14,17,18</sup> poor anti-coagulation control among patients on warfarin,<sup>19</sup> worse medication adherence<sup>20</sup> among adults with HIV/AIDS, and poor blood pressure control among adults with hypertension.<sup>21</sup>

Similar to these conditions, the management of HF requires numerical skill. Patients are expected to maintain a diet low in salt (often less than 2,000 mg a day), monitor their blood pressure, and weigh themselves daily. However, the role of numeracy in the management of HF has not been studied. Herein we addressed this gap by examining how numerical information is viewed and used among HF patients.

## Methods

### Participant Selection and Study Setting

We conducted one-on-one semi-structured interviews with 30 adults with a history of HF, from December 2016 through March 2017. Patients were recruited from a hospital-based

1  
2  
3 ambulatory clinic in New York, NY. To be considered eligible, patients must have had a  
4 diagnosis of HF for at least one year, had an office visit at the clinic within the last year, and  
5 must have been admitted to the hospital with a primary diagnosis of HF within the last 6 months.  
6  
7 Non-English speakers, those with severe visual, hearing, or cognitive impairment were excluded.  
8  
9 The Six-Item Screener (SIS)<sup>22</sup> was used to assess cognition.  
10  
11  
12  
13

14  
15 The electronic health record was used to identify HF patients who met our eligibility  
16 criteria. Among those who were eligible, purposive sampling<sup>23</sup> was used to achieve a balanced  
17 sample with respect to gender, race/ethnicity, and duration of HF (years). Eligible patients were  
18 called by telephone to gauge their interest in participating. At their next clinic visit they were  
19 approached by one author (A.F.S.), who detailed the consent process.  
20  
21  
22  
23  
24  
25

26 Of the 72 patients who were eligible to participate, 32 refused and 4 were excluded for  
27 cognitive impairment (Supplemental Figure 1). Of the 36 participants who provided written  
28 consent, 6 withdrew. Overall, our study included 30 participants.  
29  
30  
31  
32  
33

### 34 Data Collection

35  
36 One author (M.R.S.) conducted in-person semi-structured interviews with each  
37 participant which lasted 20 to 40 minutes. The interview topic guide inquired about numeracy  
38 across three domains of HF self-care: 1) monitoring weight and fluid; 2) maintaining a low salt  
39 diet; and 3) monitoring blood pressure (Appendix 1). It was piloted for ease and  
40 comprehensibility with 5 participants who were not included in the final study. Data saturation,  
41 or the point at which no new themes emerged, was achieved by the 17<sup>th</sup> interview, however  
42 additional interviews were conducted to maximize the robustness of the findings.  
43  
44  
45  
46  
47  
48  
49  
50  
51

52 Participants completed a socio-demographic questionnaire following the interview.  
53  
54 Medication use was ascertained through pill bottle review. The 10-item Center for  
55  
56  
57  
58  
59  
60

1  
2  
3 Epidemiologic Studies Depression Scale (C-DES-10) was used to measure of depressive  
4 symptoms.<sup>24</sup> To assess subjective numeracy skill, participants completed the Subjective  
5 Numeracy Scale (SNS)<sup>25</sup>, a validated 8-item instrument which measures numeracy on a scale of  
6 6-48 with higher scores indicating higher numeracy skills.  
7  
8  
9  
10  
11

12 Participants received a \$25.00 gift card for their participation. The study was approved by  
13 the Institutional Review Board of the Weill Cornell Medical College.  
14  
15  
16

### 17 Data Analysis

18  
19 Interviews were audio-taped and professionally transcribed. Interview data were  
20 managed with ATLAS.ti Software and analyzed using grounded theory.<sup>26,27</sup> Two investigators  
21 (M.R.S. and A.F.S.) independently reviewed the first five transcripts and drafted preliminary  
22 codes according to their independent review. Codes were applied to segments of text, usually  
23 defined by one or more relevant concepts. A third investigator (L.R.) reviewed the first five  
24 transcripts and both code lists before consolidating the lists into a final codebook. The  
25 investigators then reviewed the transcripts a second time, coding the data using the uniform  
26 codebook, which was subsequently applied to the remaining transcripts. The resulting unique  
27 initial codes were entered into a word cloud using ATLAS.ti. Common codes were consolidated  
28 into categories and were compared and revised by all three investigators. Finally, categories  
29 were consolidated into common unifying themes, which a fourth investigator reviewed (M.M.S.).  
30 Since little is known about numeracy in the context of HF, and since the data did not fit well with  
31 existing numeracy frameworks,<sup>28-30</sup> a new theoretical framework was generated from the  
32 analysis.  
33  
34  
35  
36  
37  
38  
39  
40  
41  
42  
43  
44  
45  
46  
47  
48  
49  
50  
51  
52  
53  
54  
55  
56  
57  
58  
59  
60



### Quality Assurance and Patient Involvement

The study adhered to the Consolidated Criteria for Reporting Qualitative research (COREQ).<sup>31</sup> Additionally, to ensure that our study had the ability to investigate the HF patients' perspective on numeracy, the semi-structured interview guide and the post-interview survey were piloted for ease and comprehensibility with five HF patients who were not included in the final study. At the conclusion of the study, the findings were shared with the study participants and with HF patients at the clinic in which the study was conducted.

## **Results**

### Characteristics of Study Population

The 30 participants were mean age of 67 years (SD 10), 17 (56.7%) were female, 7 (23.3%) were White, 15 (50%) were Black, 6 (20%) were Hispanic, and 2 (6.7%) were Asian/Pacific Islander (Table 1). Twenty-one (70%) had at least a high school education and 12 (40%) had Medicare or Medicaid. On average, participants had HF for 11 years (SD 7.8) and 22 (73.3%) were considered to have New York Heart Association (NYHA) classes two and three. The mean SNS was 27 (SD 10.3).

### Major Themes

Interviews resulted in 501 initial codes which were then grouped into 13 categories, from which five key themes emerged, discussed next.

#### **Theme 1: Communication between health care providers and patients is a complex, multi-stage process**

1  
2  
3 Six distinct categories comprised this theme: (1) receiving information, (2) receiving  
4 explanations, (3) barriers to receiving information and explanations, (4) the role of non-  
5 physicians, (5) reliance on in-person communication with physicians, and (6) asking questions.  
6  
7  
8  
9

### 10 11 12 Receiving Information

13  
14 The receipt of numerical information pertaining to HF self-care was highly variable.  
15 While some participants received information and instructions about weighing themselves,  
16 following a low salt diet, or monitoring their blood pressure, others did not receive information  
17 on any of these topics. This variation in communication is represented by the following two  
18 quotations:  
19  
20  
21  
22  
23  
24  
25

26 *“Every doctor at the office and in the hospital told me I need to follow a low salt diet.”*

27  
28 *“This is the first time I’ve ever heard that I’m supposed to weigh myself at home. Should I be*  
29 *doing that?”*  
30  
31  
32

### 33 Receiving Explanations

34  
35 Among those who received information about HF self-care, few participants received  
36 explanations or real-life examples of how to apply these concepts, along with the information.  
37 This is illustrated in the following quotations:  
38  
39  
40  
41

42 *“Yeah, I take the 40-dose of the water pill every day. But, no one explained to me why I take it,*  
43 *or why 40.”*  
44  
45

46  
47 *“2,000 mg – what does that even mean? What does that number represent? Nobody has*  
48 *explained that to me.”*  
49  
50

### 51 Barriers to Receiving Information and Explanations

1  
2  
3           Sensory impairments were cited as barriers to communicating with providers. Among  
4  
5 them were memory, hearing loss, and visual impairment. Additionally, many participants  
6  
7 conveyed that they go to the doctor's office without their reading glasses.  
8  
9

10       *"I'm not sure if anyone gave me instructions about a 2,000-mg salt diet. I forget things. Maybe*  
11 *they did and I don't remember?"*  
12

13  
14       *"I'm embarrassed when I can't hear the doctor. My hearing aids broke a while back."*  
15  
16

### 17 18 The Role of Non-physicians

19  
20           More than half of the participants spoke of non-physicians (nurse practitioners, dieticians,  
21  
22 and pharmacists) as critical to communication:  
23

24  
25       *"I take my blood pressure at the drugstore. I tell the pharmacist what it is and he tells me what*  
26 *to do."*  
27

### 28 29 30 31 Reliance on in-person Communication with Physicians

32  
33           Participants frequently described weighing themselves and checking their blood pressure  
34  
35 at the doctor's office, and less often in their homes:  
36

37       *"I only get weighed at the doctor's office – and I go there every 4 to 5 months."*  
38  
39

40  
41           Among those who did carry out these tasks at home, many preferred to report abnormal values at  
42  
43 their next office visit, rather than call their physician.  
44

45       *"When my blood pressure is very high, I write it down and tell my doctor at my next*  
46 *appointment."*  
47

48  
49  
50           Some went directly to the ER when they saw abnormal values at home, rather than first calling  
51  
52 their physician:  
53

54       *"When my blood pressure is out of control, I go straight to the hospital. Nothin' my doctor can*  
55 *do when I'm home."*  
56  
57

## Asking Questions

The patient-provider relationship affected their willingness to ask physicians questions about numerical concepts. Here, one participant expresses comfort and trust:

*“I always ask my doctor questions. Especially if I see a funny number on my pressure cuff. He’s a wonderful man -- easy to talk to.”*

On the contrary, distrust, lack of provider continuity, and fear of being judged by the provider were barriers to asking questions:

*“Every office visit I get a new doctor. They hardly know me. Why would I ask questions?”*

*“He told me about weighing myself.... It confused me, but I didn’t wanna seem dumb, so I never asked him to explain it again.”*

## **Theme 2: Patients possess a wide range of knowledge and understanding**

Three distinct categories comprised this theme: (1) understanding numeric concepts and instructions, (2) applying numeric concepts correctly, and (3) resources.

### Understanding Numeric Concepts and Instructions

While some participants understood the reasoning behind monitoring weight and salt intake, others struggled to grasp concepts, particularly blood pressure.

*“I understand why my doctor told me to weigh myself. He doesn’t want me to gain weight because it’s a sign of water build up.”*

*“I still don’t understand blood pressure. The doctors have tried to explain it, but it’s a concept I just can’t handle.”*

### Applying Numeric Concepts Correctly

1  
2  
3 Despite expressing an understanding of numerical concepts, many participants struggled  
4 to apply them correctly. When given scenarios about abnormal values, many participants failed  
5 to act.  
6  
7  
8  
9

10 *“Last month my weight went up on the scale and my legs got really swollen. But I didn’t do*  
11 *nothing. I waited until the shortness of breath came.”*  
12

13 While some were aware of their shortcomings, others were not. Instead, they were  
14 confident in their incorrect knowledge and actions. Below are two quotations which represent  
15 the “strong and wrong” patient:  
16  
17  
18

19 *“I hardly ever eat salt. Take yesterday -- I had two pancakes for breakfast, a can of sardines for*  
20 *lunch, and then soup for dinner.”*  
21  
22

23 *“My blood pressure is usually 170/100. That’s bad because the 100 is high --the bottom number*  
24 *is the important one.”*  
25  
26

27 Overall, participants’ statements suggest that there is a mismatch between self-perceived  
28 and actual ability and that they struggle to apply concepts correctly in their day-to-day lives.  
29  
30

### 31 Resources

32  
33

34 Finances were commonly cited as barriers to blood pressure and weight monitoring and  
35 health eating. In addition, chronic pain was a barrier to grocery shopping and standing on a scale.  
36  
37  
38 *“I’m on meals on wheels. I eat what they give me.”*  
39  
40  
41

### 42 **Theme 3: Social and caregiver support is critical for the application of numerical concepts**

43

44 The role of social and caregiver support was prominent throughout the interviews. The  
45 majority of participants reported that someone in their life helped them manage their HF. Family  
46 caregivers (spouses, grown children, and relatives) and paid caregivers (home health aides, home  
47 attendants, and care managers), provided participants with emotional and functional support. In  
48 addition to helping with weight monitoring, diet, and blood pressure control, caregivers assisted  
49 with grocery shopping, meal preparation, and transportation.  
50  
51  
52  
53  
54  
55  
56  
57  
58  
59  
60

1  
2  
3 Participants frequently asked caregivers to interpret and explain numerical concepts at  
4 home, as illustrated here:  
5  
6

7  
8  
9 *“When we leave the office, I ask my daughter what the doctor meant with those blood pressure  
10 numbers.”*  
11

12  
13 *“I get so many questions in my head when I get on the bus, so I call my care manager. She's  
14 good at explaining.”*  
15

16  
17  
18 This heavy reliance on caregivers had both positive and negative effects on patients'  
19 ability to apply numerical concepts and information correctly, as demonstrated by the following  
20 two quotations:  
21  
22

23  
24  
25 *“My wife looks at every single label and adds up what I can eat in terms of salt. She comes to  
26 every visit and hounds the doctor with so many questions.”*  
27

28  
29  
30 *“I don't know if I have a low-salt diet. Whatever my health aide cooks me, is what I eat.”*  
31

32 Finally, while being described as critical to their ability to engage in self-care, caregivers  
33 were not always in the room with them and the doctor. Yet, despite not being present,  
34 participants recounted that caregivers are often responsible for calling the physician for further  
35 clarification of numerical instructions.  
36  
37  
38  
39  
40

#### 41 42 **Theme 4: Prior health experiences shape outlook towards numerical concepts and** 43 **instructions** 44

45 Two categories comprised this theme: (1) attitudes towards HF and (2) experience with chronic  
46 disease and the healthcare system.  
47  
48  
49

##### 50 51 Attitudes Towards HF 52

53 For the majority of participants, attitudes and pre-existing beliefs towards HF informed  
54 their outlook towards numerical concepts associated with HF. Their ability to process and carry  
55  
56  
57  
58  
59

1  
2  
3 out numerical instructions was affected by duration of HF and their ability to adjust to the  
4  
5 diagnosis:

6  
7  
8 *“I didn't like getting all of them directions at first. It depressed me, ‘weigh yourself and drink*  
9 *only this amount.’ But then I came to terms with it.”*

10  
11 For some, the longer they had HF, the better they were at HF self-care, while for others, a longer  
12  
13 duration of illness led to less engagement. Some participants spoke about relying on their  
14  
15 symptoms to signal an acute worsening of their HF, rather than weighing themselves, which is a  
16  
17 view is represented here:

18  
19  
20 *“Look I’ve had this disease for years now. I don’t needa’ do any of this. I know when a flair up*  
21 *is coming.”*

22  
23 In addition, personal and cultural beliefs shaped behavior.

24  
25  
26 *“People at my Church get sick with this heart failure. They told me I better stay on top of this*  
27 *stuff, so I do.”*

### 28 29 30 Experience with Chronic Disease and the Healthcare System

31  
32 Overall, participants on dialysis, those taking warfarin, and those with insulin-dependent  
33  
34 diabetes seemed relatively comfortable with numerical concepts and instructions pertaining to  
35  
36 HF.

37  
38  
39 *“Following a low salt diet is pretty easy. I’ve been on Coumadin for years and I learned to limit*  
40 *foods because of the ‘K’ issue.”*

### 41 42 43 44 **Theme 5: Fear serves as a barrier and a facilitator to carrying out HF self-care tasks that** 45 **involve numbers.**

46  
47  
48 Interviews revealed that fear played a dual role. Some participants expressed fear of  
49  
50 abnormal results, which hindered their willingness to carry out numeric instructions:

51  
52  
53 *“I don’t take my blood pressure because it's better if I don't know my numbers. If I know, I'll*  
54 *worry sick.”*

1  
2  
3  
4 For others, however, the fear of death served as a facilitator in carrying out HF self-care tasks:

5  
6 *“I follow all of these instructions. Always. I want to be here for my children.”*  
7

8  
9 In addition to death, the fear of shortness of breath, being hospitalized, readmitted, and dying  
10 served as facilitators in carrying out self-care tasks at home.  
11

12  
13  
14 *“I really try and stay away from salt. Not being able to breathe, is a nasty symptom.”*  
15

## 16 17 18 Theoretical Framework 19

20  
21 Our findings were used to develop a theoretical framework that elucidates the role of  
22 numeracy in the larger context of HF self-care from the patients' perspective (Figure 1). To  
23 develop this framework, we first created a visualization of the codes from all of the initial codes  
24 which emerged directly from the interview transcripts (Supplemental Figure 2). In this word  
25 cloud, the size of a code represents the frequency in which it appeared throughout the 30  
26 interview transcripts; the larger the size, the more often the code appeared.<sup>32</sup> This approach  
27 enabled us to get a preliminary sense of what concepts were discussed most often, by the  
28 participants. Our initial framework retained the properties of the word cloud, but also  
29 incorporated the categories and themes which we identified (Supplemental Figure 3). The large  
30 directional arrow represents how participants described the process of interacting with numeric  
31 information to carry out HF self-care tasks. After feedback from study participants, we  
32 developed a more unified theoretical framework that shows how distinct factors influence the  
33 effective used of numbers in HF self-care (Figure 1). Here, the themes are in white boxes,  
34 however their size demonstrates the extent to which they emerged from the analysis. Social and  
35 caregiver support and patient-provider communication appear the largest in size, since the codes  
36  
37  
38  
39  
40  
41  
42  
43  
44  
45  
46  
47  
48  
49  
50  
51  
52  
53  
54  
55  
56  
57  
58  
59  
60



1  
2  
3 and categories that comprised them appeared most often. One overarching arrow (left to right)  
4  
5 as well as smaller ones detail the relationship between themes and categories.  
6  
7  
8  
9

## 10 **Discussion**

11  
12 To our knowledge, this is the first study to evaluate the role of numeracy in the context of  
13 HF from the patients' perspective. Our findings add to the literature in several key ways. First,  
14 we found that among a socio-economically and racially diverse group of HF patients, many  
15  
16 lacked basic understanding and skills required for adequate self-care. Second, the study  
17  
18 participants relied heavily on caregivers to help them understand and carry out self-care tasks  
19  
20 which required numeracy skills. Third, we found that the communication of numerical concepts  
21  
22 between health care providers and patients was complex and highly variable. Finally, as  
23  
24 depicted in our theoretical framework, we found that while patient numeracy skills are important  
25  
26 in HF, they may not be as critical as patient-provider communication and caregiver support were  
27  
28 to understanding and applying numerical concepts pertaining to HF self-care.  
29  
30  
31  
32  
33  
34

35 Like other studies<sup>33,34</sup> that found that HF patients struggle with HF self-care, our findings  
36 suggest that patients have difficulty integrating and applying numerical concepts and instructions  
37 home. For example, while many participants reported receiving information about a low sodium  
38 diet, few were able to correctly navigate real-life scenarios that asked them to calculate the  
39 sodium content in a meal. This deficit is consistent with a study by Rothman et al (2006), which  
40 highlighted patient shortfalls with nutrition label comprehension.<sup>35</sup> In addition, many  
41 participants struggled with understanding the implications of abnormal blood pressure values.  
42 This mismatch was also seen with SNS scores; many of the participants who rated themselves as  
43 above average with respect to numeracy, were unable to correctly apply numerical concepts  
44  
45  
46  
47  
48  
49  
50  
51  
52  
53  
54  
55  
56  
57  
58  
59  
60

1  
2  
3 during their interview. Notably, some participants, were unaware that they possessed incorrect  
4 information. This was further compounded by ill-informed caregivers on whom they relied.  
5  
6 While others have shown that perceived numerical abilities differ from actual abilities,<sup>36,37</sup> ours  
7  
8 is the first to report on this in HF.  
9  
10

11  
12 While we intended to examine patient numeracy in the context of HF self-care, we found  
13 that HF patients relied heavily on family and paid caregivers to receive, understand, and perform  
14 HF self-care tasks that require numeracy skills. Notably, this differs from the existing body of  
15 numeracy literature in other chronic diseases, which has focused on individual patient  
16 numeracy.<sup>14-16,19,21</sup> This may be because HF patients differ from adults with other chronic  
17 diseases -- they are often older adults with multiple chronic conditions, who are frequently  
18 hospitalized, and many have sensory impairments, including cognitive impairment, which may  
19 hinder their ability to self-manage, particularly with respect to numerical tasks.<sup>38,39</sup> Consistent  
20 with prior studies,<sup>40,41</sup> our findings suggest that relying on caregivers may have inconsistent  
21 effects on patients' disease management; we found that caregivers equipped with HF knowledge  
22 who communicated with providers were able to help patients, whereas those with incorrect  
23 knowledge and little contact with the physician were detrimental.  
24  
25  
26  
27  
28  
29  
30  
31  
32  
33  
34  
35  
36  
37  
38  
39

40 In addition, we found that the communication of numerical concepts and instructions  
41 between providers and patients is a multi-stage process, which can go awry at several points.  
42 Receiving numerical information required that providers offer it and that patients were able to  
43 hear, see, and mentally process it. This, more often than not, required explanations and real-life  
44 examples, as well as adequate time for questions. Addressing these elements will require  
45 interventions that can overcome the constraints of contemporary office visits, which are often too  
46 short to allow this kind of interaction.  
47  
48  
49  
50  
51  
52  
53  
54  
55  
56  
57  
58  
59  
60

1  
2  
3 Notably, many participants preferred to ask caregivers or go to the emergency room when  
4 they received abnormal numerical results at home, rather than calling their physician. There are  
5 a few possible reasons for why this is. First, barriers in the healthcare system may discourage  
6 them from calling. Second, the patient-provider relationship may be an important determinant,  
7 since we found that those who called their physician reported feeling “close” to them. Third,  
8 patient characteristics like hearing loss and language barriers may deter phone communication.  
9

10  
11 Interestingly, while participants asked caregivers for help interpreting numerical  
12 instructions, they reported that caregivers were not often included in physician office visits.  
13  
14 Although research has shown that family caregivers of HF patients often feel ignored by the  
15 healthcare system,<sup>42</sup> it is currently unknown how paid caregivers feel. Nonetheless, given the  
16 degree to which patients rely on caregiver knowledge and numeracy skills, it may be prudent for  
17 providers to include them in the visit if the patient agrees.  
18  
19

### 20 21 22 Strengths and Limitations

23  
24 Our study’s strengths include that it is the first to examine numeracy from the HF  
25 patients’ perspective. We used a purposive sampling strategy to recruit a diverse group of  
26 patients, which is more methodologically rigorous than convenience sampling, a method used by  
27 many qualitative studies. Despite purposive sampling, however, the study is limited in  
28 generalizability due to its qualitative nature and small sample size. Our focus was the patients’  
29 perspective, but given our findings, future studies should examine the perspectives of HF  
30 patients’ caregivers on numeracy. Another limitation is that we did not formally assess  
31 participants’ health literacy, since it is thought to be a similar but distinct concept from numeracy  
32 and a wealth of research has already focused on literacy in the context of HF. However, future  
33  
34  
35  
36  
37  
38  
39  
40  
41  
42  
43  
44  
45  
46  
47  
48  
49  
50  
51  
52  
53  
54  
55  
56  
57  
58  
59  
60

1  
2  
3 studies may consider doing so. Finally, we excluded non-English speakers, who may experience  
4  
5 numerical concepts differently than patients discussed here.<sup>43</sup>  
6  
7  
8  
9

## 10 **Conclusion**

11  
12 Overall, our findings suggest that the communication of numerical concepts and  
13  
14 instructions between providers and HF patients is a complex, multi-stage process which is often  
15  
16 highly variable. In addition, receiving, understanding and applying numerical concepts integral  
17  
18 to HF self-care is challenging for many adults with HF. We found that many rely heavily on  
19  
20 caregivers to perform numerical tasks and interpret numerical results, yet the training of  
21  
22 caregivers relative to these demands, is unclear. Ultimately, patient-provider communication and  
23  
24 HF-specific training of caregivers may be more important influences on successful HF self-care  
25  
26 than interventions aimed at individual patient numeracy.  
27  
28  
29  
30  
31  
32  
33  
34  
35  
36  
37  
38  
39  
40  
41  
42  
43  
44  
45  
46

47 **Conflicts of Interest:** M. Sterling, A. Silva, S. Dargar, L. Robbins, and M. Schapira have no  
48 conflicts to report. M. Safford receives salary support for investigator initiated research from  
49 Amgen, Inc.  
50

51 **Funding:** Dr. Sterling is supported by T32HS000066 from the Agency for Healthcare Research  
52 and Quality. The content is solely the responsibility of the authors and does not necessarily  
53 represent the official views of the Agency for Healthcare Research and Quality.  
54  
55  
56  
57  
58  
59  
60

1  
2  
3 **Data Sharing:** Due to the qualitative nature of this study, and the fact that data are written  
4 transcripts of patient interviews, no additional data available.  
5

6  
7 **Author's Contributions:**

8 Concept and Design of the Study (M.R.S., M.M.Sa., M.M.Sc., S.K.D.)

9 Acquisition of Data and Analysis (M.R.S., A.F.S., S.K.D., L.R., M.M.Sa.)

10 Drafting of the manuscript (M.R.S.)

11 Critical revision of the manuscript (M.R.S., A.F.S., M.M.Sc., L.R., M.M.Sa., S.K.D.)

12 Final approval of the manuscript (M.R.S., A.F.S., M.M.Sc., L.R., M.M.Sa., S.K.D.)  
13

14  
15 **Acknowledgment:** We would like to thank all of the patients who gave their time and offered us  
16 their valuable insights. We would also like to thank Dr. Fred Pelzman and Dr. Judy Tung for  
17 their clinical support; Dr. Mary Charlson, Dr. Carol Mancuso, and Dr. Carla Boutin-Foster for  
18 their research guidance; Dr. Travis Gossey for assistance with the electronic medical record; and  
19 Dr. Jim Hollenberg for creating a secure web-site on ClinvestiGator for data entry.  
20

21  
22 **Prior Presentations:** This material was presented as a podium presentation at the *Agency for*  
23 *Healthcare Research and Quality's* (AHRQ) 23rd Annual National Research Service Award  
24 (NRSA) Research Trainees Conference, on June 24, 2017 in New Orleans, LA. This material  
25 was also presented as a podium presentation at the Weill Cornell Medicine's *Primary Care*  
26 *Innovation Symposium*, on September 15, 2017, where it was awarded "Best Research Abstract"  
27 in the Fellow category.  
28  
29  
30  
31  
32  
33  
34  
35  
36  
37  
38  
39  
40  
41  
42  
43  
44  
45  
46  
47  
48  
49  
50  
51  
52  
53  
54  
55  
56  
57  
58  
59  
60

## References

1. Jencks SF, Williams MV, Coleman EA. Rehospitalizations among patients in the Medicare fee-for-service program. *N Engl J Med*. 2009;360(14):1418-1428.
2. Lloyd-Jones D, Adams RJ, Brown TM, et al. Heart disease and stroke statistics--2010 update: a report from the American Heart Association. *Circulation*. 2010;121(7):e46-e215.
3. Riegel B, Moser DK, Anker SD, et al. State of the science: promoting self-care in persons with heart failure: a scientific statement from the American Heart Association. *Circulation*. 2009;120(12):1141-1163.
4. Cajita MI, Cajita TR, Han HR. Health Literacy and Heart Failure: A Systematic Review. *The Journal of cardiovascular nursing*. 2016;31(2):121-130.
5. Dennison CR, McEntee ML, Samuel L, et al. Adequate health literacy is associated with higher heart failure knowledge and self-care confidence in hospitalized patients. *The Journal of cardiovascular nursing*. 2011;26(5):359-367.
6. Macabasco-O'Connell A, DeWalt DA, Broucksou KA, et al. Relationship between literacy, knowledge, self-care behaviors, and heart failure-related quality of life among patients with heart failure. *J Gen Intern Med*. 2011;26(9):979-986.
7. Khaledi GH, Mostafavi F, Eslami AA, Rooh Afza H, Akbar H. Evaluation of the Effect of Perceived Social Support on Promoting Self-Care Behaviors of Heart Failure Patients Referred to The Cardiovascular Research Center of Isfahan. *Iranian Red Crescent medical journal*. 2015;17(6):e22525.
8. Shahriari M, Ahmadi M, Babae S, Mehrabi T, Sadeghi M. Effects of a family support program on self-care behaviors in patients with congestive heart failure. *Iranian journal of nursing and midwifery research*. 2013;18(2):152-157.
9. Davis KK, Himmelfarb CR, Szanton SL, Hayat MJ, Allen JK. Predictors of heart failure self-care in patients who screened positive for mild cognitive impairment. *The Journal of cardiovascular nursing*. 2015;30(2):152-160.
10. Harkness K, Heckman GA, Akhtar-Danesh N, Demers C, Gunn E, McKelvie RS. Cognitive function and self-care management in older patients with heart failure. *European journal of cardiovascular nursing : journal of the Working Group on Cardiovascular Nursing of the European Society of Cardiology*. 2014;13(3):277-284.
11. McNaughton CD, Collins SP, Kripalani S, et al. Low numeracy is associated with increased odds of 30-day emergency department or hospital recidivism for patients with acute heart failure. *Circulation Heart failure*. 2013;6(1):40-46.
12. Sterling MR, Safford MM, Goggins K, et al. Numeracy, Health Literacy, Cognition, and 30-Day Readmissions among Patients with Heart Failure. *Journal of hospital medicine*. 2018.
13. Rothman RL, Montori VM, Cherrington A, Pignone MP. Perspective: the role of numeracy in health care. *Journal of health communication*. 2008;13(6):583-595.
14. Cavanaugh K, Huizinga MM, Wallston KA, et al. Association of numeracy and diabetes control. *Ann Intern Med*. 2008;148(10):737-746.
15. Abdel-Kader K, Dew MA, Bhatnagar M, et al. Numeracy Skills in CKD: Correlates and Outcomes. *Clin J Am Soc Nephrol*. 2010;5(9):1566-1573.
16. Schwartz LM, Woloshin S, Black WC, Welch HG. The role of numeracy in understanding the benefit of screening mammography. *Ann Intern Med*. 1997;127(11):966-972.
17. Bowen ME, Cavanaugh KL, Wolff K, Davis D, Gregory B, Rothman RL. Numeracy and dietary intake in patients with type 2 diabetes. *The Diabetes educator*. 2013;39(2):240-247.

18. Osborn CY, Cavanaugh K, Wallston KA, White RO, Rothman RL. Diabetes numeracy: an overlooked factor in understanding racial disparities in glycemic control. *Diabetes care*. 2009;32(9):1614-1619.
19. Estrada CA, Martin-Hryniewicz M, Peek BT, Collins C, Byrd JC. Literacy and numeracy skills and anticoagulation control. *The American journal of the medical sciences*. 2004;328(2):88-93.
20. Moore JO, Boyer EW, Safren S, et al. Designing Interventions to Overcome Poor Numeracy and Improve Medication Adherence in Chronic Illness, Including HIV/Aids. *J Med Toxicol*. Vol 72011:133-138.
21. Rao VN, Sheridan SL, Tuttle LA, et al. The effect of numeracy level on completeness of home blood pressure monitoring. *Journal of clinical hypertension (Greenwich, Conn)*. 2015;17(1):39-45.
22. Callahan CM, Unverzagt FW, Hui SL, Perkins AJ, Hendrie HC. Six-item screener to identify cognitive impairment among potential subjects for clinical research. *Med Care*. 2002;40(9):771-781.
23. Palinkas LA, Horwitz SM, Green CA, Wisdom JP, Duan N, Hoagwood K. Purposeful Sampling for Qualitative Data Collection and Analysis in Mixed Method Implementation Research. *Administration and policy in mental health*. 2015;42(5):533-544.
24. Andresen EM, Malmgren JA, Carter WB, Patrick DL. Screening for depression in well older adults: evaluation of a short form of the CES-D (Center for Epidemiologic Studies Depression Scale). *Am J Prev Med*. 1994;10(2):77-84.
25. Fagerlin A, Zikmund-Fisher BJ, Ubel PA, Jankovic A, Derry HA, Smith DM. Measuring numeracy without a math test: development of the Subjective Numeracy Scale. *Medical decision making : an international journal of the Society for Medical Decision Making*. 2007;27(5):672-680.
26. Foley G, Timonen V. Using Grounded Theory Method to Capture and Analyze Health Care Experiences. *Health services research*. 2015;50(4):1195-1210.
27. Merriam SB. *Qualitative Research: A Guide To Design And Implementation*. San Francisco, California: Jossey-Bass; 2009.
28. Schapira MM, Fletcher KE, Gilligan MA, et al. A framework for health numeracy: how patients use quantitative skills in health care. *Journal of health communication*. 2008;13(5):501-517.
29. Lipkus IM, Peters E. Understanding the role of numeracy in health: proposed theoretical framework and practical insights. *Health education & behavior : the official publication of the Society for Public Health Education*. 2009;36(6):1065-1081.
30. Ancker JS, Kaufman D. Rethinking Health Numeracy: A Multidisciplinary Literature Review. *J Am Med Inform Assoc*. Vol 142007:713-721.
31. Tong A, Sainsbury P, Craig J. Consolidated criteria for reporting qualitative research (COREQ): a 32-item checklist for interviews and focus groups. *International journal for quality in health care : journal of the International Society for Quality in Health Care*. 2007;19(6):349-357.
32. McNaught CaL, P. Using Wordle as a Supplementary Research Tool. *The Qualitative Report*. 2010;15(3):630-643.
33. Spaling MA, Currie K, Strachan PH, Harkness K, Clark AM. Improving support for heart failure patients: a systematic review to understand patients' perspectives on self-care. *Journal of advanced nursing*. 2015;71(11):2478-2489.
34. Harkness K, Spaling MA, Currie K, Strachan PH, Clark AM. A systematic review of patient heart failure self-care strategies. *The Journal of cardiovascular nursing*. 2015;30(2):121-135.
35. Rothman RL, Housam R, Weiss H, et al. Patient understanding of food labels: the role of literacy and numeracy. *Am J Prev Med*. 2006;31(5):391-398.
36. Dolan JG, Cherkasky OA, Li Q, Chin N, Veazie PJ. Should Health Numeracy Be Assessed Objectively or Subjectively? *Medical decision making : an international journal of the Society for Medical Decision Making*. 2015.



- 1  
2  
3 37. Ciampa PJ, Osborn CY, Peterson NB, Rothman RL. Patient Numeracy, Perceptions of Provider  
4 Communication, and Colorectal Cancer Screening Utilization.  
5 <http://dx.doi.org/10.1080/108107302010522699>. 2010.  
6  
7 38. Delazer M, Kemmler G, Benke T. Health numeracy and cognitive decline in advanced age.  
8 *Neuropsychology, development, and cognition Section B, Aging, neuropsychology and cognition*.  
9 2013;20(6):639-659.  
10 39. Pertl MT, Benke T, Zamarian L, et al. Do patients with mild cognitive impairment understand  
11 numerical health information? *Journal of Alzheimer's disease : JAD*. 2014;40(3):531-540.  
12 40. Rosland AM, Heisler M, Choi H, Silveira MJ, Piette JD. Family Influences on Self-Management  
13 Among Functionally Independent Adults with Diabetes or Heart Failure: Do Family Members  
14 Hinder As Much As They Help? *Chronic illness*. 2010;6(1):22-33.  
15 41. Strachan PH, Currie K, Harkness K, Spaling M, Clark AM. Context matters in heart failure self-  
16 care: a qualitative systematic review. *Journal of cardiac failure*. 2014;20(6):448-455.  
17 42. Nicholas Dionne-Odom J, Hooker SA, Bekelman D, et al. Family caregiving for persons with heart  
18 failure at the intersection of heart failure and palliative care: a state-of-the-science review.  
19 *Heart failure reviews*. 2017.  
20 43. Schapira MM, Fletcher KE, Ganschow PS, et al. The meaning of numbers in health: exploring  
21 health numeracy in a Mexican-American population. *J Gen Intern Med*. 2011;26(7):705-711.  
22  
23  
24  
25  
26  
27  
28  
29  
30  
31  
32  
33  
34  
35  
36  
37  
38  
39  
40  
41  
42  
43  
44  
45  
46  
47  
48  
49  
50  
51  
52  
53  
54  
55  
56  
57  
58  
59  
60



**Table 1. Characteristics of the Study Population**

| Patient Characteristics                                    | All (N = 30) |
|------------------------------------------------------------|--------------|
| <b>Age, years (mean[SD])</b>                               | 67 (10)      |
| <b>Gender</b>                                              |              |
| Female N(%)                                                | 17 (56.7%)   |
| <b>Race</b>                                                |              |
| White N(%)                                                 | 7 (23.3%)    |
| Black N(%)                                                 | 15 (50%)     |
| Hispanic N(%)                                              | 6 (20%)      |
| Asian/Pacific Islander N(%)                                | 2 (6.7%)     |
| <b>Educational degree</b>                                  |              |
| No degree N(%)                                             | 3 (10%)      |
| Some HS N(%)                                               | 6 (20%)      |
| GED or HS completed N(%)                                   | 6 (20%)      |
| Some College N(%)                                          | 8 (26.7%)    |
| 4 year College Degree N(%)                                 | 3 (10%)      |
| Graduate Degree N(%)                                       | 4 (13.3%)    |
| <b>Insurance type</b>                                      |              |
| None N(%)                                                  | 5 (20.8%)    |
| Private N(%)                                               | 7 (29.2%)    |
| Medicare N(%)                                              | 5 (20.8%)    |
| Medicaid N(%)                                              | 6 (25%)      |
| Medicare and Medicaid N(%)                                 | 1 (5.6%)     |
| <b>NYHA Class</b>                                          |              |
| 1                                                          | 8 (26.7%)    |
| 2                                                          | 11 (36.7%)   |
| 3                                                          | 11 (36.7%)   |
| <b>Number of years with HF diagnosis, years (mean[SD])</b> | 10.9 (7.8)   |
| <b>Number of medications taking for HF</b>                 |              |
| Don't know N(%)                                            | 2 (6.7%)     |
| 1 -5 N(%)                                                  | 25 (83.3%)   |
| 6-10 N(%)                                                  | 3 (10%)      |
| >10 N(%)                                                   | 0 (%)        |
| <b>Number of medications taking overall</b>                |              |
| Don't know N(%)                                            | 0 (%)        |
| 1-5 N(%)                                                   | 3 (10%)      |
| 6-10 N(%)                                                  | 19 (63.3%)   |
| >10 N(%)                                                   | 8 (26.7%)    |
| <b>Depressed symptoms</b>                                  |              |
| C-DES-10, mean(SD)                                         | 12.3 (5.3)   |
| <b>Subjective numeracy</b>                                 |              |
| SNS-8, mean(SD)                                            | 27 (10.3)    |

1  
2  
3  
4  
5  
6  
7  
8  
9  
10  
11  
12  
13  
14  
15  
16  
17  
18  
19  
20  
21  
22  
23  
24  
25  
26  
27  
28  
29  
30  
31  
32  
33  
34  
35  
36  
37  
38  
39  
40  
41  
42  
43  
44  
45  
46  
47  
48  
49  
50  
51  
52  
53  
54  
55  
56  
57  
58  
59  
60

For peer review only

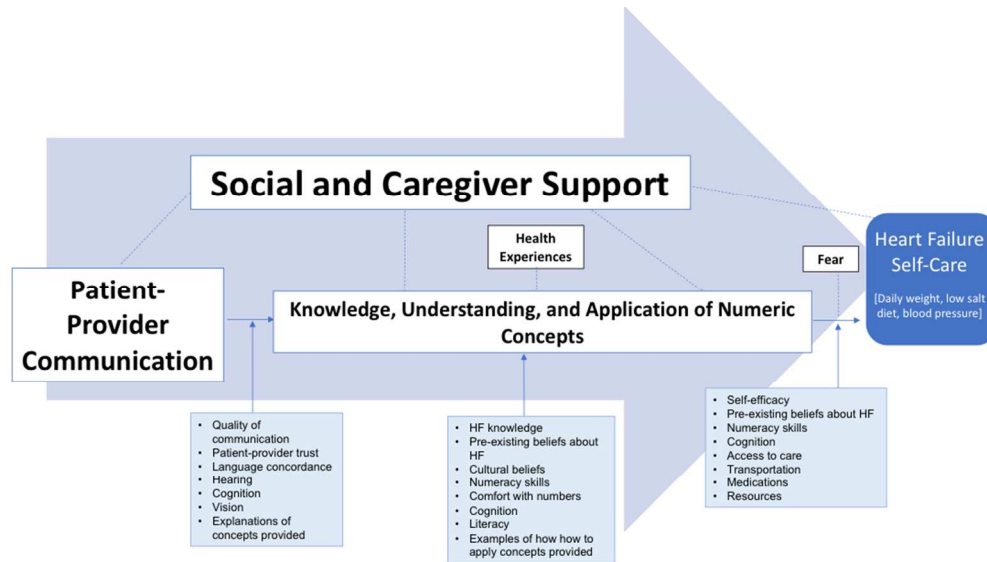

Figure 1. Theoretical Framework of Factors Influencing Effective Use of Numbers in HF self-care

Figure Legend: The final theoretical framework is a summation of the thematic content derived from grounded theory, along with features of the word cloud. As shown by their size, social and caregiver support and patient-provider communication emerged as the two most dominant themes. One overarching arrow (left to right), as well as smaller ones, detail the relationship between themes, categories, and prominent codes. Solid lines represent unidirectional relationships, whereas dashed lines represent bidirectional relationships. Input from study participants was incorporated into this final conceptual framework.

### Supplemental Figure 1. Study Flow Diagram

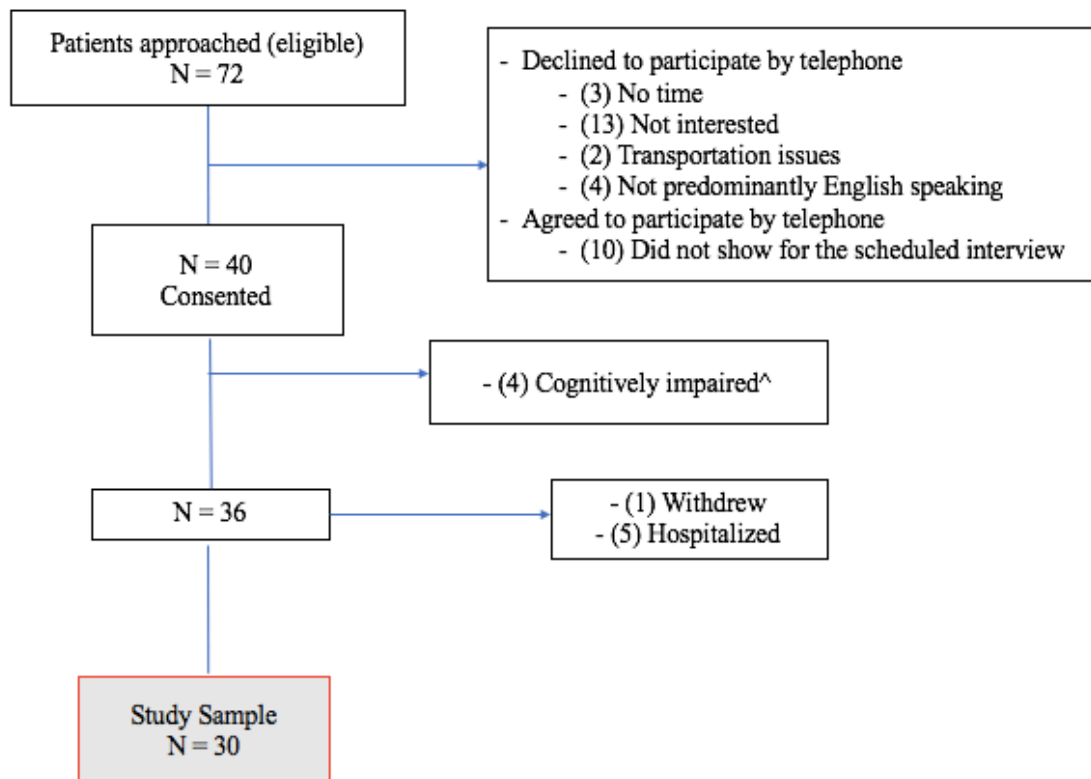

**Figure Legend:** Overview of study population. ^Cognitive impairment was assessed using the Six Item Screener by Callahan et al (2002), a well validated instrument which assesses global cognitive impairment. Cognitive impairment was defined as a score of 0 – 4 (correct) and intact cognitive function was defined as a score of 5 or 6 (correct).

## Supplemental Figure 2. Excerpt from the Word Cloud Derived from Codes Applied to Interview Transcripts

**Figure Legend:** The size of the codes represents the frequency in which they appeared throughout the 30 interview transcripts; the larger the size, the more often the code was used. ATLAS.ti software was used to generate the Word Cloud.

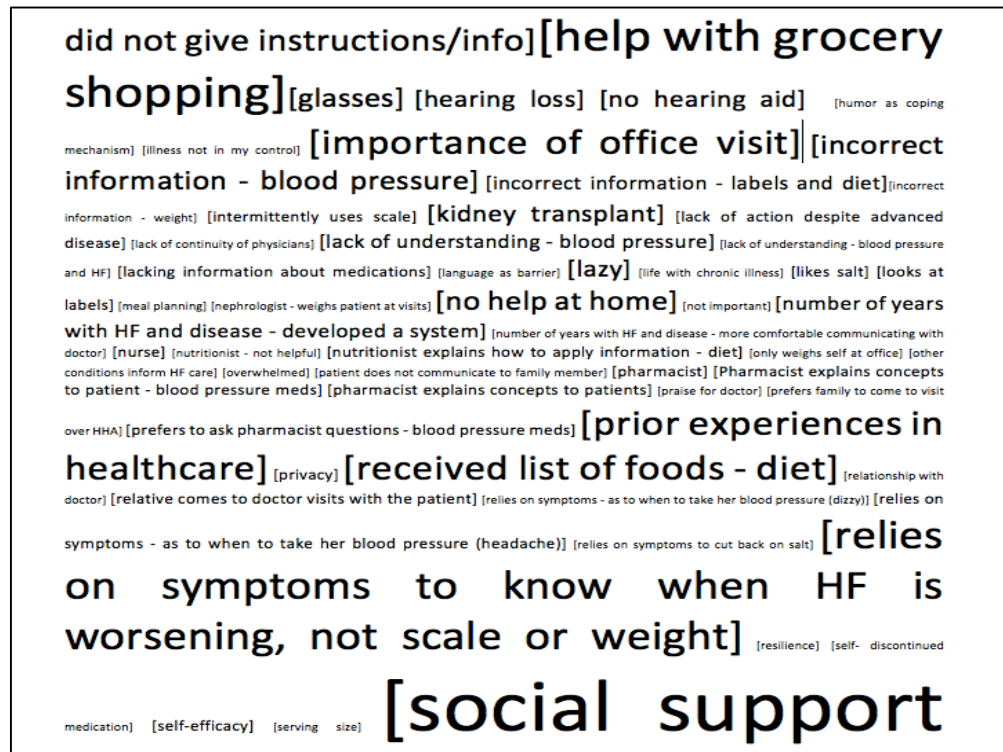

Supplemental Figure 3. Initial Conceptual Framework

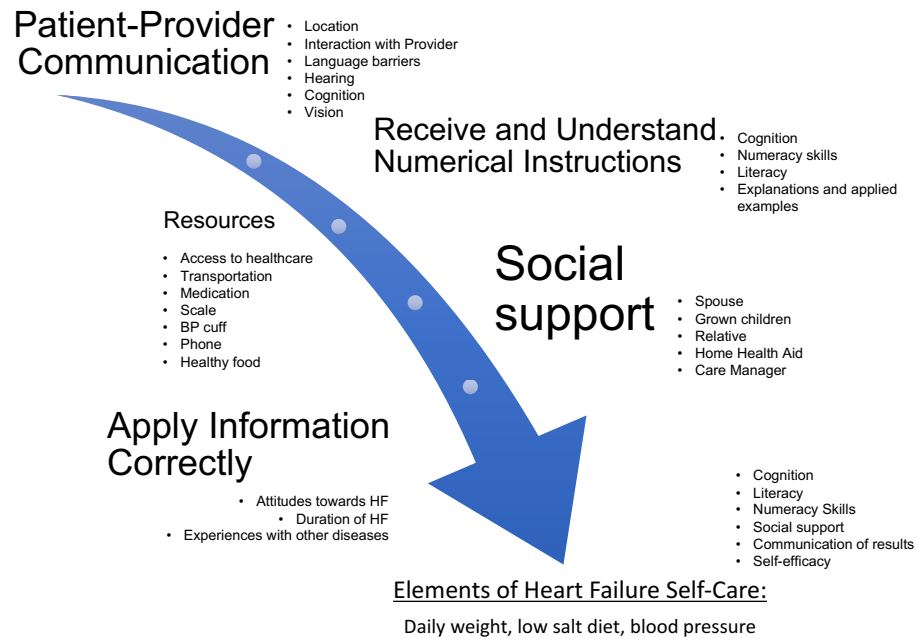

**Figure Legend:** This initial conceptual framework combines features of the word cloud with results from our grounded theory approach to represent the patient’s perspective on numeracy across three domains of heart failure self-care: daily weight monitoring, maintaining a diet low in salt, and monitoring blood pressure.

The Consolidated criteria for reporting qualitative research (COREQ): a 32-item checklist for interviews and focus groups

| No. Item                                       | Guide questions/description                                                                                                                                                                                                                      | Considered |
|------------------------------------------------|--------------------------------------------------------------------------------------------------------------------------------------------------------------------------------------------------------------------------------------------------|------------|
| <b>Domain 1: Research team and reflexivity</b> |                                                                                                                                                                                                                                                  |            |
| <b>Personal Characteristics</b>                |                                                                                                                                                                                                                                                  |            |
| 1. Inter viewer/facilitator                    | Which author/s conducted the interview or focus group? M.R.S., page 5                                                                                                                                                                            | Yes        |
| 2. Credentials                                 | What were the researcher's credentials? MD, MPH, page 1                                                                                                                                                                                          | Yes        |
| 3. Occupation                                  | What was their occupation at the time of the study? Physician-researcher, page 1                                                                                                                                                                 | Yes        |
| 4. Gender                                      | Was the researcher male or female? Female, page 1                                                                                                                                                                                                | Yes        |
| 5. Experience and training                     | What experience or training did the researcher have? M.R.S. is a AHRQ research fellow (qualitative training is mandatory), page 1; A.F.S. Trained in qualitative study coding; L.R. Qualitative expert; page 1                                   | Yes        |
| <b>Relationship with participants</b>          |                                                                                                                                                                                                                                                  |            |
| 6. Relationship established                    | Was a relationship established prior to study commencement? No Participants who were deemed eligible were approached to gauge interest in participating, page 5                                                                                  | No         |
| 7. Participant knowledge of the interviewer    | What did the participants know about the researcher? They her title, research experience, and motivation for doing the study (consent form), page 6                                                                                              | Yes        |
| 8. Interviewer characteristics                 | What characteristics were reported about the inter viewer/facilitator? Title, research experience, and motivation for doing the study, page 6                                                                                                    | Yes        |
| <b>Domain 2: Study design</b>                  |                                                                                                                                                                                                                                                  |            |
| <b>Theoretical framework</b>                   |                                                                                                                                                                                                                                                  |            |
| 9. Methodological orientation and Theory       | What methodological orientation was stated to underpin the study? Grounded theory, page 6                                                                                                                                                        | Yes        |
| 10. Sampling                                   | How were participants selected? Purposive sampling, page 5                                                                                                                                                                                       | Yes        |
| 11. Method of approach                         | How were participants approached? Telephone, followed by face-to-face by A.F.S., page 5                                                                                                                                                          | Yes        |
| 12. Sample size                                | How many participants were in the study? 30, page 5                                                                                                                                                                                              | Yes        |
| 13. Non-participation                          | How many people refused to participate or dropped out? 42 (see study flow diagram for reasons), page 5 and supplemental figure.                                                                                                                  | Yes        |
| <b>Setting</b>                                 |                                                                                                                                                                                                                                                  |            |
| 14. Setting of data collection                 | Where was the data collected? Clinic, page 6                                                                                                                                                                                                     | Yes        |
| 15. Presence of non-participants               | Was anyone else present besides the participants and researchers? No, page N/A                                                                                                                                                                   | Yes        |
| 16. Description of sample                      | What are the important characteristics of the sample? Demographics (age, sex, race/ethnicity, education, insurance), clinical (HF duration, severity of HF, medications) and health system characteristics (provider type, utilization), page 6. | Yes        |
| <b>Data collection</b>                         |                                                                                                                                                                                                                                                  |            |

|                                        |                                                                                                                                                                                   |     |
|----------------------------------------|-----------------------------------------------------------------------------------------------------------------------------------------------------------------------------------|-----|
| 17. Interview guide                    | Were questions, prompts, guides provided by the authors? Was it pilot tested? Yes (topic guide available with questions and prompts), Yes, it was pilot tested, page 5 and page 7 | Yes |
| 18. Repeat interviews                  | Were repeat interviews carried out? If yes, how many? No                                                                                                                          | N/A |
| 19. Audio/visual recording             | Did the research use audio or visual recording to collect the data? Interviews were audio-recorded, page 6                                                                        | Yes |
| 20. Field notes                        | Were field notes made during and/or after the interview or focus group? Yes, no page                                                                                              | Yes |
| 21. Duration                           | What was the duration of the inter views or focus group? 20- 40 minutes, page 5                                                                                                   | Yes |
| 22. Data saturation                    | Was data saturation discussed? Yes, it was reached at 17 participants, page 5                                                                                                     | Yes |
| 23. Transcripts returned               | Were transcripts returned to participants for comment and/or correction? Main results were shared with participants for feedback but not transcripts, page 7                      | Yes |
| <b>Domain 3: Analysis and findings</b> |                                                                                                                                                                                   |     |
| <b>Data analysis</b>                   |                                                                                                                                                                                   |     |
| 24. Number of data coders              | How many data coders coded the data? Three, page 6                                                                                                                                | Yes |
| 25. Description of the coding tree     | Did authors provide a description of the coding tree? No                                                                                                                          | No  |
| 26. Derivation of themes               | Were themes identified in advance or derived from the data? Derived from the data, page 6.                                                                                        | Yes |
| 27. Software                           | What software, if applicable, was used to manage the data? ATLAS.Ti, page 6                                                                                                       | Yes |
| 28. Participant checking               | Did participants provide feedback on the findings? Yes, feedback was received from study participants, page 7                                                                     | Yes |
| <b>Reporting</b>                       |                                                                                                                                                                                   |     |
| 29. Quotations presented               | Were participant quotations presented to illustrate the themes/findings? Was each quotation identified? Yes, by participant ID number – pages 8 - 14                              | Yes |
| 30. Data and findings consistent       | Was there consistency between the data presented and the findings? Yes                                                                                                            | Yes |
| 31. Clarity of major themes            | Were major themes clearly presented in the findings? Yes, page 7 - 14                                                                                                             | Yes |
| 32. Clarity of minor themes            | Is there a description of diverse cases or discussion of minor themes? Yes                                                                                                        | Yes |



# BMJ Open

## Let's Talk Numbers – A Qualitative Study of Community-dwelling US Adults to Understand the Role of Numeracy in the Management of Heart Failure

|                                 |                                                                                                                                                                                                                                                                                                                                                                                                                                                                                                            |
|---------------------------------|------------------------------------------------------------------------------------------------------------------------------------------------------------------------------------------------------------------------------------------------------------------------------------------------------------------------------------------------------------------------------------------------------------------------------------------------------------------------------------------------------------|
| Journal:                        | <i>BMJ Open</i>                                                                                                                                                                                                                                                                                                                                                                                                                                                                                            |
| Manuscript ID                   | bmjopen-2018-023073.R1                                                                                                                                                                                                                                                                                                                                                                                                                                                                                     |
| Article Type:                   | Research                                                                                                                                                                                                                                                                                                                                                                                                                                                                                                   |
| Date Submitted by the Author:   | 19-Jun-2018                                                                                                                                                                                                                                                                                                                                                                                                                                                                                                |
| Complete List of Authors:       | Sterling, Madeline; Cornell University Joan and Sanford I Weill Medical College<br>Silva, Ariel; Cornell University Joan and Sanford I Weill Medical College<br>Robbins, Laura; Hospital for Special Surgery<br>Dargar, Savira; Cornell University Joan and Sanford I Weill Medical College<br>Schapira, Marilyn; University of Pennsylvania Perelman School of Medicine;<br>Corporal Michael J Crescenz VA Medical Center<br>Safford, Monika; Cornell University Joan and Sanford I Weill Medical College |
| <b>Primary Subject Heading</b>: | Cardiovascular medicine                                                                                                                                                                                                                                                                                                                                                                                                                                                                                    |
| Secondary Subject Heading:      | General practice / Family practice, Qualitative research, Patient-centred medicine, Communication                                                                                                                                                                                                                                                                                                                                                                                                          |
| Keywords:                       | Heart failure < CARDIOLOGY, health numeracy, QUALITATIVE RESEARCH, PRIMARY CARE, health communication                                                                                                                                                                                                                                                                                                                                                                                                      |
|                                 |                                                                                                                                                                                                                                                                                                                                                                                                                                                                                                            |

SCHOLARONE™  
Manuscripts

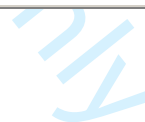

**Title:** Let's Talk Numbers – A Qualitative Study of Community-dwelling US Adults to Understand the Role of Numeracy in the Management of Heart Failure

**Author(s):** Madeline R. Sterling<sup>1</sup>, M.D., M.P.H., M.S., Ariel F. Silva<sup>1</sup>, N.P., Laura Robbins<sup>2</sup>, D.S.W., Savira K. Dargar<sup>1</sup>, M.S., Marilyn M. Schapira<sup>3,4</sup>, M.D., M.P.H., Monika M. Safford<sup>1</sup>, M.D.

**Author Affiliations:**

1. Division of General Internal Medicine, Department of Medicine, Weill Cornell Medical College, New York, NY.
2. Hospital for Special Surgery, Education and Academic Affairs, New York, NY
3. Department of Medicine, Perelman School of Medicine, University of Pennsylvania, Philadelphia, PA.
4. Crescenz VA Medical Center, Philadelphia, PA.

**Corresponding Author:**

Madeline R. Sterling, M.D., M.P.H., M.S.  
AHRQ Health Services Research Fellow  
Division of General Internal Medicine, Department of Medicine  
Weill Cornell Medical College  
1300 York Avenue, P.O. Box 46  
New York, N.Y. 10065  
Phone: 646-962-5029  
Fax: 646-962-4610  
Email : mrs9012@med.cornell.edu  
Twitter: @mad\_sters

**Funding:** Dr. Sterling is supported by T32HS000066 from the Agency for Healthcare Research and Quality. The content is solely the responsibility of the authors and does not necessarily represent the official views of the Agency for Healthcare Research and Quality.

**Abstract word count:** 293

**Manuscript word count:** 4,192

**Tables:** 1

**Figures:** 1

**Supplemental Figures:** 3

**COREQ Checklist Included** (to assess quality of qualitative studies)

**Keywords:** heart failure, health numeracy, chronic disease management, qualitative study, health services research

## Abstract

**Objective:** To examine the perspectives of adults with heart failure (HF) about numerical concepts integral to HF self-care.

**Setting:** This qualitative study took place at an urban academic primary care practice.

**Participants:** Thirty men and women aged 47 to 89 years with a history of HF were recruited to participate. Eligibility criteria included: a history of HF ( $\geq 1$  year), seen at the clinic within the last year, and a HF hospitalization within the last 6 months. Non-English speakers and those with severe cognitive impairment were excluded.

**Methods:** In-depth semi-structured interviews were conducted. Participants were interviewed about numeracy across three domains of HF self-care: 1) monitoring weight; 2) maintaining a diet low in salt; and 3) monitoring blood pressure. Interviews were audiotaped, transcribed verbatim, and analyzed using grounded theory and word cloud techniques.

**Results:** Five key themes reflecting participants' attitudes towards numerical concepts pertaining to weight, diet, and blood pressure were identified: (1) Communication between healthcare providers and patients is a complex, multi-stage process (2) Patients possess a wide range of knowledge and understanding (3) Social and caregiver support is critical for the application of numerical concepts (4) Prior health experiences shape outlook towards numerical concepts and instructions (5) Fear serves as a barrier and a facilitator to carrying out HF self-care tasks that involve numbers. The findings informed a theoretical framework of health numeracy in HF.

**Conclusion:** Effective communication of numerical concepts which pertain to HF self-care is highly variable. Many HF patients lack basic understanding and numeracy skills required for adequate self-care. As such, patients rely on caregivers who may lack HF training. HF specific training of caregivers and research that seeks to elucidate the intricacies of the patient-caregiver relationship in the context of health numeracy and HF self-care, are warranted.

### Strengths and Limitations

- This is the first study to examine heart failure (HF) patients' perspectives towards numerical concepts of HF self-care; the main results and theoretical framework which emerged add to the literature and have implications for future research and clinical care.
- A purposive sampling strategy was used to recruit a diverse group of patients, which is more methodologically rigorous than other sampling strategies.
- Interviews were thoroughly analyzed using grounded theory.
- The study is limited in generalizability since it took place at one academic urban medical center.
- The study only included English speaking HF patients, which also limits the generalizability of the findings.

## Introduction

There are 1 million heart failure (HF) hospitalizations each year and 25% of patients admitted for HF are readmitted within 30 days.<sup>1,2</sup> Part of this unplanned healthcare utilization is thought to be preventable by improved HF self-care.<sup>3</sup> Prior studies have found social and cognitive factors to be associated with HF self-care, including health literacy,<sup>4</sup> HF knowledge,<sup>5,6</sup> social support,<sup>7,8</sup> and cognitive impairment.<sup>9,10</sup> Yet, little is known about health numeracy in the context of HF.<sup>11,12</sup>

Health numeracy is the ability to access, understand, and apply numerical data to health-related decisions.<sup>13</sup> Although poor numeracy skills can coexist with low health literacy, numeracy and literacy measure different constructs and many adults tend to have worse quantitative skills.<sup>13-16</sup> With respect to chronic diseases, low numeracy is associated with worse glycemic control among adults with diabetes,<sup>14,17,18</sup> poor anti-coagulation control among patients on warfarin,<sup>19</sup> worse medication adherence<sup>20</sup> among adults with HIV/AIDS, and poor blood pressure control among adults with hypertension.<sup>21</sup>

Similar to these conditions, the management of HF requires numerical skill. Patients are expected to maintain a diet low in salt (often less than 2,000 mg/day), monitor their blood pressure, and weigh themselves daily. However, despite the degree to which numerical skills are needed for adequate HF self-care, to date only two studies have examined numeracy in the context of HF and they have done so by investigating the association between numeracy and the risk of readmission among adults hospitalized for HF.<sup>11,12</sup> Although informative, the results of these studies were conflicting, and neither investigated the role of numeracy in the management of HF or from the patients' perspective. Herein we addressed this gap by examining how numerical information is viewed and used among community-dwelling adults with HF.

## Methods

### Participant Selection and Study Setting

We conducted one-on-one semi-structured interviews with 30 adults with a history of HF, from December 2016 through March 2017. Patients were recruited from a hospital-based ambulatory clinic in New York, NY. To be considered eligible, patients must have had a diagnosis of HF for at least one year, had an office visit at the clinic within the last year, and must have been admitted to the hospital with a primary diagnosis of HF within the last 6 months. Non-English speakers, those with severe visual, hearing, or cognitive impairment were excluded. The Six-Item Screener (SIS)<sup>22</sup> was used to assess cognition. The electronic health record was used to identify HF patients who met our eligibility criteria.

Among those who were eligible, purposive sampling<sup>23</sup> was used to achieve a balanced sample with respect to gender, race/ethnicity, and duration of HF (years), as prior qualitative studies have shown variation across these characteristics with respect to self-care.<sup>24</sup> Purposive sampling is a technique widely used in qualitative research for the identification and selection of information-rich informants that cover the range of variation.<sup>23</sup> Eligible patients were called by telephone to gauge their interest in participating. At their next clinic visit they were approached by one author (A.F.S.), who detailed the consent process.

Of the 72 patients who were eligible to participate, 32 refused and 4 were excluded for cognitive impairment (Supplemental Figure 1). Of the 36 participants who provided written consent, 6 withdrew. Overall, our study included 30 participants.

### Data Collection

1  
2  
3 One author (M.R.S.) with qualitative research experience conducted the in-person semi-  
4 structured interviews with each participant which lasted up to 40 minutes. Interviews were  
5 conducted using a standard interview guide, which included probes to elicit clarification and  
6 additional detail from participants. This approach is the most common in qualitative studies  
7 which seek to understand patients' perspectives on self-care in chronic diseases.<sup>25-27</sup> The  
8 interview topic guide, which was informed by the numeracy literature (in other chronic diseases)  
9 as well as our clinical experience with HF patients, allowed us to focus on numeracy in HF self-  
10 care, but also allowed for participant responses' to drive the direction and tone of the interview.  
11 The interview topic guide inquired about numeracy across three domains of HF self-care: 1)  
12 monitoring weight and fluid; 2) maintaining a low salt diet; and 3) monitoring blood pressure  
13 (Appendix 1). Data saturation, or the point at which no new themes emerged,<sup>28</sup> was achieved by  
14 the 17<sup>th</sup> interview, however additional interviews were conducted to maximize the robustness of  
15 the findings.  
16  
17  
18  
19  
20  
21  
22  
23  
24  
25  
26  
27  
28  
29  
30  
31

32  
33 Participants completed a socio-demographic questionnaire following the interview.  
34 Medication use was ascertained through pill bottle review. The 10-item Center for  
35 Epidemiologic Studies Depression Scale (C-DES-10) was used to measure of depressive  
36 symptoms.<sup>29</sup> To assess subjective numeracy skill, participants completed the Subjective  
37 Numeracy Scale (SNS)<sup>30</sup>, a validated 8-item instrument which measures numeracy on a scale of  
38 6-48 with higher scores indicating higher numeracy skills.  
39  
40  
41  
42  
43  
44  
45  
46

47 Participants received a \$25.00 gift card for their participation. The study was approved by  
48 the Institutional Review Board of the Weill Cornell Medical College.  
49  
50

### 51 52 53 Data Analysis 54 55 56 57 58 59 60

1  
2  
3 Interviews were audio-taped, professionally transcribed, and data were managed with  
4 ATLAS.ti Software. The data were analyzed using grounded theory.<sup>31,32</sup> To ensure  
5 methodological rigor, a constant comparative approach was used at each stage of the  
6 analysis.<sup>33,34</sup> First, two investigators (M.R.S. and A.F.S.) independently reviewed and open  
7 coded the first five transcripts, each drafting a preliminary coding schema which totaled 551  
8 codes. Codes were applied to segments of text, usually defined by one or more relevant  
9 concepts. A third investigator (L.R.) reviewed the first five transcripts and both code lists before  
10 consolidating the lists into a final codebook, which was comprised of 77 unique codes. The  
11 investigators then reviewed the transcripts a second time, coding the data using the uniform  
12 codebook, which was subsequently applied to the remaining transcripts. During this process, the  
13 two coders met to revise the codebook, removing some codes while adding others. Once all  
14 transcripts were coded, the three investigators then compared common codes using dimensions  
15 and properties and consolidated them into 13 categories by consensus. The categories were then  
16 consolidated into five unifying themes, which a fourth investigator reviewed (M.M.S.).  
17 Quotations from each theme were anonymized and selected for presentation.  
18  
19  
20  
21  
22  
23  
24  
25  
26  
27  
28  
29  
30  
31  
32  
33  
34  
35  
36  
37  
38  
39

#### 40 Theoretical framework

41  
42 Since little is known about numeracy in the context of HF, and since existing frameworks  
43 did not incorporate the scope of the themes that emerged herein,<sup>35-37</sup> a new theoretical framework  
44 was generated from the analysis. To develop this framework, we first created a visualization of  
45 all of the initial codes which emerged directly from the interview transcripts using word cloud  
46 software in ATLAS.ti (Supplemental Figure 2). In this word cloud, the size of a code  
47 represented the frequency in which it appeared; the larger the size, the more often the code  
48  
49  
50  
51  
52  
53  
54  
55  
56  
57  
58  
59  
60



1  
2  
3 appeared.<sup>38</sup> This enabled us to get a preliminary sense of what concepts were discussed most  
4 often, by the participants. Our initial framework retained the properties of the word cloud, but  
5 also incorporated the categories and themes which emerged during the analytic process  
6 (Supplemental Figure 3). After feedback from study participants and health services researchers,  
7 we developed a more unified theoretical framework (Figure 1).  
8  
9  
10  
11  
12  
13  
14  
15  
16

### 17 Quality Assurance

18  
19 The study adhered to the Consolidated Criteria for Reporting Qualitative research  
20 (COREQ).<sup>39</sup>  
21  
22  
23  
24  
25

### 26 Patient and Public involvement

27  
28 Additionally, to ensure that our study had the ability to investigate HF patients'  
29 perspective on health numeracy, the semi-structured interview guide and the post-interview  
30 survey were piloted for ease and comprehensibility with five HF patients who were not included  
31 in the final study. At the conclusion of the study, the findings were shared with the study  
32 participants. Findings were also disseminated to the scientific community at two research  
33 conferences in 2017.  
34  
35  
36  
37  
38  
39  
40  
41  
42  
43

## 44 **Results**

### 45 Characteristics of Study Population

46  
47 The 30 participants were mean age of 67 years (SD 10), 17 (57%) were female, 7 (23%)  
48 were White, 15 (50%) were Black, 6 (20%) were Hispanic, and 2 (7%) were Asian/Pacific  
49 Islander (Table 1). Twenty-one (70%) had at least a high school education and 12 (40%) had  
50  
51  
52  
53  
54  
55  
56  
57  
58  
59  
60

1  
2  
3 Medicare or Medicaid. On average, participants had HF for 11 years (SD 7.8) and 22 (73%)  
4  
5 were considered to have New York Heart Association (NYHA) classes two and three. The mean  
6  
7 SNS was 27 (SD 10.3).  
8  
9  
10  
11

## 12 Major Themes

13  
14 Five key themes emerged from our study, which are subsequently described and  
15  
16 illustrated with anonymized quotes.  
17  
18  
19  
20

### 21 **Theme 1: Communication between health care providers and patients is a complex, multi-** 22 23 **stage process**

24  
25 Participants described the process of receiving numerical information about HF self-care  
26  
27 to be a highly variable one. While some HF patients had received information and instructions  
28  
29 about weighing themselves, following a low salt diet, and monitoring their blood pressure during  
30  
31 the course of their disease, others had not. This variation in communication is represented by the  
32  
33 following two quotations:  
34  
35  
36

37 *“Every doctor at the office and in the hospital told me I need to follow a low salt diet.”*

38  
39  
40 *“This is the first time I’ve ever heard that I’m supposed to weigh myself at home. Should I be*  
41 *doing that?”*  
42  
43

44  
45 Among those who did receive this information, few reported receiving accompanying  
46  
47 explanations or real-life examples of how to apply numerical concepts and instructions, as shown  
48  
49 here:  
50

51 *“Yeah, I take the 40-dose of the water pill every day. But, no one explained to me why I take it,*  
52 *or why 40.”*  
53  
54  
55  
56  
57  
58  
59  
60

1  
2  
3 *“2,000 mg – what does that even mean? What does that number represent? Nobody has*  
4 *explained that to me.”*  
5  
6  
7

8 Participants revealed that common barriers to communicating about these topics with  
9  
10 providers in the clinic and the hospital included memory loss and hearing loss and visual  
11  
12 impairment:  
13

14  
15 *“I’m not sure if anyone gave me instructions about a 2,000-mg salt diet. I forget things. Maybe*  
16 *they did and I don’t remember?”*  
17

18 *“I’m embarrassed when I can’t hear the doctor. My hearing aids broke a while back.”*  
19

20 In addition to not having hearing aids, several participants conveyed that they go to the doctor’s  
21  
22 office without their reading glasses.  
23

24  
25 Notably, many participants spoke of non-physicians, particularly nurse practitioners,  
26  
27 dietitians, and pharmacists, as critical to the communication and understanding of numerical  
28  
29 information and instructions in HF. However, when they received abnormal numerical results  
30  
31 many preferred to speak directly with physicians:  
32  
33

34 *“When my blood pressure is very high, I write it down and tell my doctor at my next*  
35 *appointment.”*  
36  
37

38 Some went directly to the emergency department when they saw abnormal values at home, rather  
39  
40 than first calling their physician:  
41  
42

43 *“When my blood pressure is out of control, I go straight to the hospital. Nothin’ my doctor can*  
44 *do when I’m home.”*  
45  
46  
47

48 Finally, participants spoke about the importance of the patient-provider relationship in  
49  
50 communication. Specifically, many felt that this relationship affected their willingness to ask  
51  
52 physicians questions about numerical concepts. Here, one participant expresses comfort and  
53  
54 trust:  
55  
56  
57  
58  
59  
60

1  
2  
3 *"I always ask my doctor questions. Especially if I see a funny number on my pressure cuff. He's*  
4 *a wonderful man -- easy to talk to."*  
5

6  
7 On the contrary, distrust, lack of provider continuity, and fear of being judged by the provider  
8  
9 were barriers to asking questions:  
10

11  
12 *"He told me about weighing myself.... It confused me, but I didn't wanna seem dumb, so I never*  
13 *asked him to explain it again."*  
14

## 15 16 17 **Theme 2: Patients possess a wide range of knowledge and understanding** 18

19  
20 While some participants understood the reason for monitoring weight, blood pressure,  
21  
22 and salt intake, others struggled to grasp these concepts:  
23

24  
25 *"I understand why my doctor told me to weigh myself. He doesn't want me to gain weight*  
26 *because it's a sign of water build up."*  
27

28  
29 *"I still don't understand blood pressure. The doctors have tried to explain it, but it's a concept*  
30 *I just can't handle."*  
31

32  
33  
34  
35 Among those who expressed an understanding of numerical concepts associated with HF  
36  
37 self-care, many participants struggled to apply them correctly. In fact, when given scenarios  
38  
39 about abnormal values, many failed to interpret them and answer correctly:  
40

41  
42 *"Last month my weight went up on the scale and my legs got really swollen. But I didn't do*  
43 *nothing. I waited until the shortness of breath came."*  
44

45  
46 While some participants were aware of their shortcomings, others were not. Instead, they  
47  
48 were confident in their incorrect knowledge and actions. The following two quotations represent  
49  
50 the "strong and wrong" patient:  
51

52  
53 *"I hardly ever eat salt. Take yesterday -- I had two pancakes for breakfast, a can of sardines for*  
54 *lunch, and then soup for dinner."*  
55

1  
2  
3 *“My blood pressure is usually 170/100. That’s bad because the 100 is high --the bottom number*  
4 *is the important one.”*  
5

6  
7 Overall, participants’ statements suggest that there is a mismatch between self-perceived  
8  
9 and actual ability and that they struggle to apply concepts correctly in their day-to-day lives.  
10

11 Finally, participants cited a lack of financial resources as a main barrier to monitoring  
12  
13 blood pressure and eating healthy:  
14

15  
16 *“I’m on meals on wheels. I eat what they give me.”*  
17

18  
19 In addition, chronic pain was cited as a barrier to grocery shopping and standing on a  
20  
21 scale during weight measurement.  
22  
23

### 24 25 26 **Theme 3: Social and caregiver support is critical for the application of numerical concepts** 27

28 The role of social and caregiver support was prominent throughout the interviews. The  
29  
30 majority of participants reported that someone in their life helped them manage their HF. Family  
31  
32 caregivers (spouses, grown children, and relatives) and paid caregivers (home health aides, home  
33  
34 attendants, and care managers), provided participants with emotional and functional support. In  
35  
36 addition to helping with weight monitoring, diet, and blood pressure control, caregivers assisted  
37  
38 with grocery shopping, meal preparation, and transportation.  
39  
40

41  
42 Participants frequently asked caregivers to interpret and explain numerical concepts at  
43  
44 home, as illustrated here:  
45  
46

47  
48 *“When we leave the office, I ask my daughter what the doctor meant with those blood pressure*  
49 *numbers.”*  
50

51  
52  
53 *“I get so many questions in my head when I get on the bus, so I call my care manager. She’s*  
54 *good at explaining.”*  
55  
56  
57  
58  
59

1  
2  
3 This heavy reliance on caregivers had both positive and negative effects on patients'  
4 ability to apply numerical concepts and information correctly, as demonstrated by the following  
5  
6 two quotations:  
7  
8

9  
10 *“My wife looks at every single label and adds up what I can eat in terms of salt. She comes to*  
11 *every visit and hounds the doctor with so many questions.”*  
12

13  
14 *“I don’t know if I have a low-salt diet. Whatever my health aide cooks me, is what I eat.”*  
15  
16

17  
18 Finally, while being described as critical to their ability to engage in self-care, caregivers  
19 were not always in the room them and the doctor. Yet, despite not being present, participants  
20 recounted that caregivers are often responsible for calling the physician for further clarification  
21 of numerical instructions.  
22  
23  
24  
25

#### 26 27 28 **Theme 4: Prior health experiences shape outlook towards numerical concepts and** 29 **instructions** 30

31 For many participants, attitudes and pre-existing beliefs towards HF informed their  
32 outlook towards numerical concepts associated with HF. Their ability to process and carry out  
33 numerical instructions was affected by duration of HF and their ability to adjust to the diagnosis:  
34  
35

36 *“I didn't like getting all of them directions at first. It depressed me, ‘weigh yourself and drink*  
37 *only this amount.’ But then I came to terms with it.”*  
38

39  
40  
41  
42 For some, the longer they had HF, the better they were at HF self-care, while for others, a longer  
43 duration of illness led to less engagement. Some participants spoke about relying on their  
44 symptoms to signal an acute worsening of their HF, rather than weighing themselves, which is a  
45 view is represented here:  
46  
47

48 *“Look I’ve had this disease for years now. I don’t needa’ do any of this. I know when a flair up*  
49 *is coming.”*  
50

51 In addition, personal and cultural beliefs shaped behavior.  
52  
53  
54  
55  
56  
57  
58  
59  
60

1  
2  
3  
4 *“People at my Church get sick with this heart failure. They told me I better stay on top of this*  
5 *stuff, so I do.”*  
6  
7

8  
9 In addition to their attitudes towards HF, experience with other chronic diseases and the  
10 healthcare system seemed to affect their comfort with numeracy skills integral to HF self-care.  
11 For example, participants on dialysis, those taking warfarin, and those with insulin-dependent  
12 diabetes seemed relatively comfortable with numerical concepts and instructions pertaining to  
13 HF:  
14  
15  
16  
17  
18  
19

20 *“Following a low salt diet is pretty easy. I’ve been on Coumadin for years and I learned to limit*  
21 *foods because of the ‘K’ issue.”*  
22  
23

#### 24 25 **Theme 5: Fear serves as a barrier and a facilitator to carrying out HF self-care tasks that** 26 **involve numbers.** 27

28  
29 Interviews revealed that fear played a dual role. Some participants expressed fear of  
30 abnormal results, which hindered their willingness to carry out numeric instructions:  
31  
32

33 *“I don’t take my blood pressure because it’s better if I don’t know my numbers. If I know, I’ll*  
34 *worry sick.”*  
35  
36  
37

38 For others, however, the fear of death served as a facilitator in carrying out HF self-care tasks:  
39

40 *“I follow all of these instructions. Always. I want to be here for my children.”*  
41  
42

43 In addition to death, the fear of shortness of breath, being hospitalized, readmitted, and dying  
44 served as facilitators in carrying out self-care tasks at home.  
45  
46  
47

48 *“I really try and stay away from salt. Not being able to breathe, is a nasty symptom.”*  
49  
50  
51  
52

#### 53 Theoretical Framework 54 55 56 57 58 59 60

1  
2  
3 The theoretical framework that emerged from these results elucidates the role of  
4 numeracy in the context of HF self-care from the patients' perspective (Figure 1). Here, the  
5 main themes that emerged from our study are in white boxes and are scaled to the size in which  
6 they affected HF self-care, from the patients' perspective. The size of the themes reflects both  
7 the degree to which they appeared in the word cloud, but also from the interpretation of the  
8 quotations in the interview transcripts. As such, social and caregiver support and patient-  
9 provider communication appear the largest in size, since these themes were most dominant in  
10 influencing outcomes, from the patients' perspectives. Blue boxes contain factors, or sub-  
11 themes, which could mediate the relationship between themes. One overarching arrow (left to  
12 right), as well as smaller arrows, detail the relationship between the themes and the other factors  
13 identified.  
14  
15  
16  
17  
18  
19  
20  
21  
22  
23  
24  
25  
26  
27  
28  
29  
30

### 31 **Discussion**

32  
33 To our knowledge, this is the first study to evaluate the role of numeracy in the context of  
34 HF from the patients' perspective. Our findings add to the literature in several key ways. First,  
35 we found that among a socio-economically and racially diverse group of HF patients, many  
36 lacked basic numerical understanding and numeracy skills required for adequate self-care.  
37  
38 Second, we found that the communication of numerical concepts between health care providers  
39 and patients is a complex and highly variable process. Third, participants relied heavily on  
40 caregivers to help them understand and carry out self-care tasks which required numeracy skills.  
41  
42 Finally, as depicted in our theoretical framework, we found that while patient numeracy skills are  
43 important, they may not be as critical as patient-provider communication and caregiver support  
44 are to understanding and applying numerical concepts pertaining to HF self-care.  
45  
46  
47  
48  
49  
50  
51  
52  
53  
54  
55  
56  
57  
58  
59  
60



1  
2  
3 Like other studies that found that HF patients struggle with HF self-care,<sup>40,41</sup> our findings  
4 suggest that patients have difficulty integrating and applying numerical concepts and instructions  
5 home. For example, while many participants reported receiving information about a low sodium  
6 diet, few were able to correctly navigate real-life scenarios that asked them to calculate the  
7 sodium content in a meal. This deficit is consistent with a study by Rothman et al (2006), which  
8 highlighted patient shortfalls with nutrition label comprehension.<sup>42</sup> In addition, many  
9 participants struggled with understanding the implications of abnormal blood pressure values.  
10 This mismatch was also seen with SNS scores; many of the participants who rated themselves as  
11 above average with respect to numeracy, were unable to correctly apply numerical concepts  
12 during the in-person interview. Notably, some participants, were unaware that they possessed  
13 incorrect information. While others have shown that perceived numerical abilities differ from  
14 actual abilities,<sup>43,44</sup> ours is the first to report on this in HF, which has important implications for  
15 hospital discharge planning and clinic visits.  
16  
17  
18  
19  
20  
21  
22  
23  
24  
25  
26  
27  
28  
29  
30  
31  
32

33 While our goal was to examine numeracy from the HF patients' perspective, many of the  
34 patients we interviewed relied heavily on family and paid caregivers to understand and perform  
35 HF self-care tasks that required numeracy skills. Notably, this finding differs from the existing  
36 body of numeracy literature in other chronic diseases, which has focused on individual patient  
37 numeracy.<sup>14-16,19,21</sup> Plausible explanations include that HF requires a high degree of self-care,  
38 they are frequently hospitalized, and they tend to be older, have multiple functional and cognitive  
39 deficits, all of which may lead them needing more help with respect to numerical tasks.<sup>45,46</sup> This  
40 may have both positive and negative implications though, as prior studies suggest that relying on  
41 caregivers has inconsistent effects on patients' disease management.<sup>47,48</sup> The numeracy skill  
42 level of caregivers in HF has not been investigated and is potentially warranted.  
43  
44  
45  
46  
47  
48  
49  
50  
51  
52  
53  
54  
55  
56  
57  
58  
59  
60

1  
2  
3 In addition, we found that the communication of numerical concepts and instructions  
4  
5 between providers and patients is a multi-stage process, which can go awry at several points. As  
6  
7 depicted by our theoretical framework, receiving numerical information requires that providers  
8  
9 offer it and that patients are able to hear, see, and cognitively process the information. Recent  
10  
11 data suggests that in the US, 75% of older adults with HF have mild or greater hearing loss,<sup>49</sup> 1  
12  
13 out of 4 adults with HF have trouble seeing up close,<sup>50</sup> and many are cognitively impaired.<sup>51</sup> In  
14  
15 addition to these cognitive and sensory deficits, we found that comprehension and application of  
16  
17 numerical concepts more often than not, required explanations and real-life examples, as well as  
18  
19 adequate time for questions. Addressing these elements will require interventions that can  
20  
21 overcome the constraints of contemporary office visits, which are often too short to allow this  
22  
23 kind of interaction. Given the degree to which participants relied on non-physicians for  
24  
25 information, it is likely that a multi-disciplinary team of healthcare providers could address some  
26  
27 of these needs.  
28  
29  
30  
31  
32

33 Interestingly, we found that when participants received an abnormal numerical result at  
34  
35 home, such as a high blood pressure reading, they preferred to discuss it with their physician in  
36  
37 the office, ask caregivers for help, or go directly to the emergency department, rather than call  
38  
39 their physician. There are a few possible reasons for why this may be. First, barriers in the  
40  
41 healthcare system may discourage them from calling. Second, the patient-provider relationship  
42  
43 may be an important determinant, since we found that those who called their physician reported  
44  
45 feeling “close” to them. Third, patient characteristics like hearing loss and language barriers  
46  
47 may deter phone communication. Of note, none of our participants reported having telehealth  
48  
49 devices which are known to transmit numerical results to the physician directly. It may be  
50  
51  
52  
53  
54  
55  
56  
57  
58  
59  
60

1  
2  
3 prudent for interventions to design flexible decision support tools which allow for varying  
4  
5 knowledge, support in the home, and practice characteristics.  
6

7  
8 Finally, as depicted by our theoretical framework, we found that several patient level  
9  
10 factors influenced how numerical information was perceived and acted upon. Participants who  
11  
12 had other conditions which required them to manipulate numbers, and those who feared negative  
13  
14 consequences of not following numerical instructions, were more willing to carry out more  
15  
16 numerically burdensome HF self-care tasks. Additionally, as shown in our framework, self-  
17  
18 efficacy, financial resources (owning a scale and being able to buy food low in salt), and the  
19  
20 ability to access care, were factors that affected this willingness to engage. Thus, in addition to  
21  
22 providers being aware of patients' outlook, beliefs, and attitudes, interventions which could  
23  
24 address some of these more modifiable factors ought to be examined.  
25  
26  
27  
28

### 29 30 Strengths and Limitations

31  
32 Our study's strengths include that it is the first qualitative study to examine numeracy in  
33  
34 the context of HF. We used a purposive sampling strategy to recruit a diverse group of patients  
35  
36 to seek a range of perspectives across gender, race/ethnicity, and chronicity of HF. Finally, we  
37  
38 develop a novel theoretical framework from our findings which can guide future research and  
39  
40 interventions on numeracy in HF. Despite purposive sampling, however, the study is limited in  
41  
42 generalizability due to recruitment from a single clinical site. Our focus was the patients'  
43  
44 perspective, but given our findings, future studies should examine the perspectives of HF  
45  
46 patients' caregivers on numeracy. Another limitation is that we did not formally assess  
47  
48 participants' health literacy, since it is thought to be a similar but distinct concept from numeracy  
49  
50 and a wealth of research has already focused on literacy in the context of HF. However, future  
51  
52 studies may consider doing so since health literacy is likely to affect many aspects of HF self-  
53  
54  
55  
56  
57  
58  
59  
60

1  
2  
3 care. Finally, we excluded non-English speakers, who may experience numerical concepts  
4  
5 differently than patients discussed here.<sup>52</sup>  
6  
7  
8  
9

## 10 **Conclusion**

11  
12 Overall, our findings suggest that the communication of numerical concepts and  
13  
14 instructions between providers and HF patients is a complex, multi-stage process and the  
15  
16 numerical information which is transmitted to patients may be highly variable. In addition,  
17  
18 receiving, understanding and applying numerical concepts integral to HF self-care is challenging  
19  
20 for many adults with HF. Perhaps owing to this, we found that many HF patients rely heavily  
21  
22 on caregivers to perform numerical tasks and interpret numerical results. Since our study  
23  
24 focused on HF patients, future studies ought to assess the numeracy skills of caregivers relative  
25  
26 to these demands. As depicted by our theoretical framework, patient-provider communication  
27  
28 and HF-specific training of caregivers may be important influences on successful HF self-care,  
29  
30 rather than interventions aimed at individual patient numeracy alone. In addition, several  
31  
32 patient-level factors, such as sensory impairments, prior experiences with other chronic diseases,  
33  
34 access to resources, and the quality of patient-provider relationship, have the ability to affect the  
35  
36 degree to which numerical concepts are understood and applied correctly. Healthcare providers  
37  
38 ought to be mindful of these issues when counseling patients on numerical tasks, as a one-size  
39  
40 fits all approach is not likely to be successful.  
41  
42  
43  
44  
45  
46  
47  
48  
49  
50  
51  
52  
53  
54  
55  
56  
57  
58  
59  
60

1  
2  
3 **Conflicts of Interest:** M. Sterling, A. Silva, S. Dargar, L. Robbins, and M. Schapira have no  
4 conflicts to report. M. Safford receives salary support for investigator-initiated research from  
5 Amgen, Inc.  
6

7  
8 **Funding:** Dr. Sterling is supported by T32HS000066 from the Agency for Healthcare Research  
9 and Quality. The content is solely the responsibility of the authors and does not necessarily  
10 represent the official views of the Agency for Healthcare Research and Quality.  
11

12 **Data Sharing:** Due to the qualitative nature of this study, the data are written transcripts of  
13 patient interviews. Although participant information is de-identified, some made references to  
14 their experiences with individual physicians, healthcare providers, and hospitals during the  
15 interviews, thus we prefer to not make these transcripts publically available.  
16

17  
18 **Author's Contributions:**

19 Concept and Design of the Study (M.R.S., M.M.Sa., M.M.Sc., S.K.D.)

20 Acquisition of Data and Analysis (M.R.S., A.F.S., S.K.D., L.R., M.M.Sa.)

21 Drafting of the manuscript (M.R.S.)

22 Critical revision of the manuscript (M.R.S., M.M.Sc., M.M.Sa.)

23 Final approval of the manuscript (M.R.S., A.F.S., M.M.Sc., L.R., M.M.Sa., S.K.D.)  
24  
25

26 **Acknowledgment:** We would like to thank all of the patients at Weill Cornell Internal Medicine  
27 Associates who gave their time and offered us their valuable insights. We would also like to  
28 thank Dr. Fred Pelzman and Dr. Judy Tung for their clinical support; Dr. Mary Charlson and Dr.  
29 Carol Mancuso for their research guidance; Dr. Travis Gossey for assistance with the electronic  
30 medical record; and Dr. Jim Hollenberg for creating a secure web-site on ClinvestiGator for data  
31 entry.  
32  
33

34 **Prior Presentations:** This material was presented as a podium presentation at the *Agency for*  
35 *Healthcare Research and Quality's* (AHRQ) 23rd Annual National Research Service Award  
36 (NRSA) Research Trainees Conference, on June 24, 2017 in New Orleans, LA. This material  
37 was also presented as a podium presentation at the Weill Cornell Medicine's *Primary Care*  
38 *Innovation Symposium*, on September 15, 2017.  
39  
40  
41  
42  
43  
44  
45  
46  
47  
48  
49  
50  
51  
52  
53  
54  
55  
56  
57  
58  
59  
60

## References

1. Jencks SF, Williams MV, Coleman EA. Rehospitalizations among patients in the Medicare fee-for-service program. *N Engl J Med*. 2009;360(14):1418-1428.
2. Lloyd-Jones D, Adams RJ, Brown TM, et al. Heart disease and stroke statistics--2010 update: a report from the American Heart Association. *Circulation*. 2010;121(7):e46-e215.
3. Riegel B, Moser DK, Anker SD, et al. State of the science: promoting self-care in persons with heart failure: a scientific statement from the American Heart Association. *Circulation*. 2009;120(12):1141-1163.
4. Cajita MI, Cajita TR, Han HR. Health Literacy and Heart Failure: A Systematic Review. *The Journal of cardiovascular nursing*. 2016;31(2):121-130.
5. Dennison CR, McEntee ML, Samuel L, et al. Adequate health literacy is associated with higher heart failure knowledge and self-care confidence in hospitalized patients. *The Journal of cardiovascular nursing*. 2011;26(5):359-367.
6. Macabasco-O'Connell A, DeWalt DA, Broucksou KA, et al. Relationship between literacy, knowledge, self-care behaviors, and heart failure-related quality of life among patients with heart failure. *J Gen Intern Med*. 2011;26(9):979-986.
7. Khaledi GH, Mostafavi F, Eslami AA, Rooh Afza H, Akbar H. Evaluation of the Effect of Perceived Social Support on Promoting Self-Care Behaviors of Heart Failure Patients Referred to The Cardiovascular Research Center of Isfahan. *Iranian Red Crescent medical journal*. 2015;17(6):e22525.
8. Shahriari M, Ahmadi M, Babae S, Mehrabi T, Sadeghi M. Effects of a family support program on self-care behaviors in patients with congestive heart failure. *Iranian journal of nursing and midwifery research*. 2013;18(2):152-157.
9. Davis KK, Himmelfarb CR, Szanton SL, Hayat MJ, Allen JK. Predictors of heart failure self-care in patients who screened positive for mild cognitive impairment. *The Journal of cardiovascular nursing*. 2015;30(2):152-160.
10. Harkness K, Heckman GA, Akhtar-Danesh N, Demers C, Gunn E, McKelvie RS. Cognitive function and self-care management in older patients with heart failure. *European journal of cardiovascular nursing : journal of the Working Group on Cardiovascular Nursing of the European Society of Cardiology*. 2014;13(3):277-284.
11. McNaughton CD, Collins SP, Kripalani S, et al. Low numeracy is associated with increased odds of 30-day emergency department or hospital recidivism for patients with acute heart failure. *Circulation Heart failure*. 2013;6(1):40-46.
12. Sterling MR, Safford MM, Goggins K, et al. Numeracy, Health Literacy, Cognition, and 30-Day Readmissions among Patients with Heart Failure. *Journal of hospital medicine*. 2018.
13. Rothman RL, Montori VM, Cherrington A, Pignone MP. Perspective: the role of numeracy in health care. *Journal of health communication*. 2008;13(6):583-595.
14. Cavanaugh K, Huizinga MM, Wallston KA, et al. Association of numeracy and diabetes control. *Ann Intern Med*. 2008;148(10):737-746.
15. Abdel-Kader K, Dew MA, Bhatnagar M, et al. Numeracy Skills in CKD: Correlates and Outcomes. *Clin J Am Soc Nephrol*. 2010;5(9):1566-1573.
16. Schwartz LM, Woloshin S, Black WC, Welch HG. The role of numeracy in understanding the benefit of screening mammography. *Ann Intern Med*. 1997;127(11):966-972.
17. Bowen ME, Cavanaugh KL, Wolff K, Davis D, Gregory B, Rothman RL. Numeracy and dietary intake in patients with type 2 diabetes. *The Diabetes educator*. 2013;39(2):240-247.

18. Osborn CY, Cavanaugh K, Wallston KA, White RO, Rothman RL. Diabetes numeracy: an overlooked factor in understanding racial disparities in glycemic control. *Diabetes care*. 2009;32(9):1614-1619.
19. Estrada CA, Martin-Hryniewicz M, Peek BT, Collins C, Byrd JC. Literacy and numeracy skills and anticoagulation control. *The American journal of the medical sciences*. 2004;328(2):88-93.
20. Moore JO, Boyer EW, Safren S, et al. Designing Interventions to Overcome Poor Numeracy and Improve Medication Adherence in Chronic Illness, Including HIV/Aids. In: *J Med Toxicol*. Vol 7. 2011:133-138.
21. Rao VN, Sheridan SL, Tuttle LA, et al. The effect of numeracy level on completeness of home blood pressure monitoring. *Journal of clinical hypertension (Greenwich, Conn)*. 2015;17(1):39-45.
22. Callahan CM, Unverzagt FW, Hui SL, Perkins AJ, Hendrie HC. Six-item screener to identify cognitive impairment among potential subjects for clinical research. *Med Care*. 2002;40(9):771-781.
23. Palinkas LA, Horwitz SM, Green CA, Wisdom JP, Duan N, Hoagwood K. Purposeful Sampling for Qualitative Data Collection and Analysis in Mixed Method Implementation Research. *Administration and policy in mental health*. 2015;42(5):533-544.
24. Wisdom JP, Cavaleri MA, Onwuegbuzie AJ, Green CA. Methodological reporting in qualitative, quantitative, and mixed methods health services research articles. *Health Serv Res*. 2012;47(2):721-745.
25. Stuckey HL. Three types of interviews: Qualitative research methods in social health. *J Soc Health Diabetes*. 2013;1:56-59.
26. Strauss Ca. Basics of Qualitative Research. 2015; <https://us.sagepub.com/en-us/nam/basics-of-qualitative-research/book235578>.
27. Glaser BG, Anselm L. Strauss, and Elizabeth Strutzel. The Discovery of Grounded Theory; Strategies for Qualitative Research.
28. Guest G, Bunce, A., Johnson, L. . How Many Interviews Are Enough? An Experiment with Data Saturation and Variability. *Field Methods*. 2006;18(1):59-82.
29. Andresen EM, Malmgren JA, Carter WB, Patrick DL. Screening for depression in well older adults: evaluation of a short form of the CES-D (Center for Epidemiologic Studies Depression Scale). *Am J Prev Med*. 1994;10(2):77-84.
30. Fagerlin A, Zikmund-Fisher BJ, Ubel PA, Jankovic A, Derry HA, Smith DM. Measuring numeracy without a math test: development of the Subjective Numeracy Scale. *Medical decision making : an international journal of the Society for Medical Decision Making*. 2007;27(5):672-680.
31. Foley G, Timonen V. Using Grounded Theory Method to Capture and Analyze Health Care Experiences. *Health services research*. 2015;50(4):1195-1210.
32. Merriam SB. *Qualitative Research: A Guide To Design And Implementation*. San Francisco, California: Jossey-Bass; 2009.
33. Eaves YD. A synthesis technique for grounded theory data analysis. *J Adv Nurs*. 2001;35(5):654-663.
34. Charmaz K. *Constructing grounded theory: a practical guide through qualitative analysis.*: Thousand Oaks: Sage Publications Inc.; 2006.
35. Schapira MM, Fletcher KE, Gilligan MA, et al. A framework for health numeracy: how patients use quantitative skills in health care. *Journal of health communication*. 2008;13(5):501-517.
36. Lipkus IM, Peters E. Understanding the role of numeracy in health: proposed theoretical framework and practical insights. *Health education & behavior : the official publication of the Society for Public Health Education*. 2009;36(6):1065-1081.
37. Ancker JS, Kaufman D. Rethinking Health Numeracy: A Multidisciplinary Literature Review. In: *J Am Med Inform Assoc*. Vol 14. 2007:713-721.



- 1
- 2
- 3 38. McNaught CaL, P. Using Wordle as a Supplementary Research Tool. *The Qualitative Report*. 2010;15(3):630-643.
- 4
- 5 39. Tong A, Sainsbury P, Craig J. Consolidated criteria for reporting qualitative research (COREQ): a
- 6 32-item checklist for interviews and focus groups. *International journal for quality in health care*
- 7 *: journal of the International Society for Quality in Health Care*. 2007;19(6):349-357.
- 8
- 9 40. Spaling MA, Currie K, Strachan PH, Harkness K, Clark AM. Improving support for heart failure
- 10 patients: a systematic review to understand patients' perspectives on self-care. *Journal of*
- 11 *advanced nursing*. 2015;71(11):2478-2489.
- 12
- 13 41. Harkness K, Spaling MA, Currie K, Strachan PH, Clark AM. A systematic review of patient heart
- 14 failure self-care strategies. *The Journal of cardiovascular nursing*. 2015;30(2):121-135.
- 15
- 16 42. Rothman RL, Housam R, Weiss H, et al. Patient understanding of food labels: the role of literacy
- 17 and numeracy. *Am J Prev Med*. 2006;31(5):391-398.
- 18
- 19 43. Dolan JG, Cherkasky OA, Li Q, Chin N, Veazie PJ. Should Health Numeracy Be Assessed
- 20 Objectively or Subjectively? *Medical decision making : an international journal of the Society for*
- 21 *Medical Decision Making*. 2015.
- 22
- 23 44. Ciampa PJ, Osborn CY, Peterson NB, Rothman RL. Patient Numeracy, Perceptions of Provider
- 24 Communication, and Colorectal Cancer Screening Utilization.
- 25 <http://dx.doi.org/10.1080/108107302010522699>. 2010.
- 26
- 27 45. Delazer M, Kemmler G, Benke T. Health numeracy and cognitive decline in advanced age.
- 28 *Neuropsychology, development, and cognition Section B, Aging, neuropsychology and cognition*.
- 29 2013;20(6):639-659.
- 30
- 31 46. Pertl MT, Benke T, Zamarian L, et al. Do patients with mild cognitive impairment understand
- 32 numerical health information? *Journal of Alzheimer's disease : JAD*. 2014;40(3):531-540.
- 33
- 34 47. Rosland AM, Heisler M, Choi H, Silveira MJ, Piette JD. Family Influences on Self-Management
- 35 Among Functionally Independent Adults with Diabetes or Heart Failure: Do Family Members
- 36 Hinder As Much As They Help? *Chronic illness*. 2010;6(1):22-33.
- 37
- 38 48. Strachan PH, Currie K, Harkness K, Spaling M, Clark AM. Context matters in heart failure self-
- 39 care: a qualitative systematic review. *Journal of cardiac failure*. 2014;20(6):448-455.
- 40
- 41 49. Sterling MR, Lin FR, Jannat-Khah DP, Goman AM, Echeverria SE, Safford MM. Hearing Loss
- 42 Among Older Adults With Heart Failure in the United States: Data From the National Health and
- 43 Nutrition Examination Survey. *JAMA Otolaryngol Head Neck Surg*. 2018.
- 44
- 45 50. Sterling MR, Jannat-Khah D, Vitale S, Safford MM. Can your patients with heart failure see? The
- 46 prevalence of visual impairment among adults with heart failure. *J Gen Intern Med*. 2018.
- 47
- 48 51. Dardiotis E, Giamouzis G, Mastrogiannis D, et al. Cognitive impairment in heart failure. *Cardiol*
- 49 *Res Pract*. 2012;2012:595821.
- 50
- 51 52. Schapira MM, Fletcher KE, Ganschow PS, et al. The meaning of numbers in health: exploring
- 52 health numeracy in a Mexican-American population. *J Gen Intern Med*. 2011;26(7):705-711.
- 53
- 54
- 55
- 56
- 57
- 58
- 59
- 60



**Table 1. Characteristics of the Study Population**

| Participant Characteristics                                | All (N = 30) |
|------------------------------------------------------------|--------------|
| <b>Age, years (mean[SD])</b>                               | 67 (10)      |
| <b>Gender</b>                                              |              |
| Female N (%)                                               | 17 (57%)     |
| <b>Race</b>                                                |              |
| White N (%)                                                | 7 (23%)      |
| Black N (%)                                                | 15 (50%)     |
| Hispanic N (%)                                             | 6 (20%)      |
| Asian/Pacific Islander N (%)                               | 2 (7%)       |
| <b>Educational degree</b>                                  |              |
| No degree N (%)                                            | 3 (10%)      |
| Some HS N (%)                                              | 6 (20%)      |
| GED or HS completed N (%)                                  | 6 (20%)      |
| Some College N (%)                                         | 8 (27%)      |
| 4 year College Degree N (%)                                | 3 (10%)      |
| Graduate Degree N (%)                                      | 4 (13%)      |
| <b>Insurance type</b>                                      |              |
| None N (%)                                                 | 5 (21%)      |
| Private N (%)                                              | 7 (29%)      |
| Medicare N (%)                                             | 5 (21%)      |
| Medicaid N (%)                                             | 6 (25%)      |
| Medicare and Medicaid N (%)                                | 1 (6%)       |
| <b>NYHA Class</b>                                          |              |
| 1                                                          | 8 (27%)      |
| 2                                                          | 11 (37%)     |
| 3                                                          | 11 (37%)     |
| <b>Number of years with HF diagnosis, years (mean[SD])</b> | 10.9 (7.8)   |
| <b>Number of medications taking for HF</b>                 |              |
| Don't know N (%)                                           | 2 (7%)       |
| 1-5 N (%)                                                  | 25 (83%)     |
| 6-10 N (%)                                                 | 3 (10%)      |
| >10 N (%)                                                  | 0 (%)        |
| <b>Number of medications taking overall</b>                |              |
| Don't know N (%)                                           | 0 (%)        |
| 1-5 N (%)                                                  | 3 (10%)      |
| 6-10 N (%)                                                 | 19 (63%)     |
| >10 N (%)                                                  | 8 (27%)      |
| <b>Depressed symptoms</b>                                  |              |
| C-DES-10, mean(SD)                                         | 12.3 (5.3)   |
| <b>Subjective numeracy</b>                                 |              |
| SNS-8, mean(SD)                                            | 27 (10.3)    |

The 10-item Center for Epidemiologic Studies Depression Scale (C-DES-10) was used to measure of depressive symptoms, with higher scores indicating more depressive symptoms. The Subjective Numeracy Scale (SNS-8) assessed patients' numeracy. The SNS-8 is a validated 8-item instrument which measures numeracy on a scale of 6-48 with higher scores indicating higher numeracy skills.

1  
2  
3 **Figure 1 Legend. Theoretical Framework of Factors Influencing Effective Use of Numbers**  
4 **in Heart Failure Self-Care.**  
5

6  
7 **Figure Legend:** The theoretical framework is a summation of the thematic content derived from  
8 grounded theory, along with features of the word cloud. As shown by their size, social and  
9 caregiver support and patient-provider communication emerged as the two most dominant  
10 themes. One overarching arrow (left to right), as well as smaller ones, detail the relationship  
11 between themes, categories, and prominent codes. Solid arrows represent unidirectional  
12 relationships, whereas dashed bi-directional arrows represent bidirectional relationships. Input  
13 from study participants was incorporated into this final conceptual framework.  
14  
15  
16  
17  
18  
19  
20  
21  
22  
23  
24  
25  
26  
27  
28  
29  
30  
31  
32  
33  
34  
35  
36  
37  
38  
39  
40  
41  
42  
43  
44  
45  
46  
47  
48  
49  
50  
51  
52  
53  
54  
55  
56  
57  
58  
59  
60

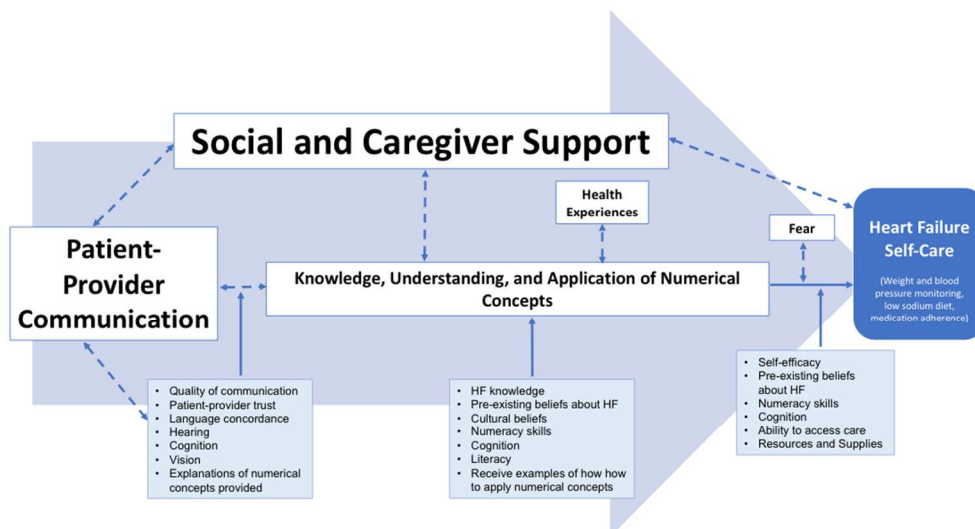

Figure 1. Theoretical Framework of Factors Influencing Effective Use of Numbers in HF Self-Care.

Figure Legend: The theoretical framework is a summation of the thematic content derived from grounded theory, along with features of the word cloud. As shown by their size, social and caregiver support and patient-provider communication emerged as the two most dominant themes. One overarching arrow (left to right), as well as smaller ones, detail the relationship between themes, categories, and prominent codes. Solid arrows represent unidirectional relationships, whereas dashed bi-directional arrows represent bidirectional relationships. Input from study participants was incorporated into this final conceptual framework.

ew only

## Supplemental Figure 1. Study Flow Diagram



**Figure Legend:** Overview of study population. ^Cognitive impairment was assessed using the Six Item Screener by Callahan et al (2002), a well validated instrument which assesses global cognitive impairment. Cognitive impairment was defined as a score of 0 – 4 (correct) and intact cognitive function was defined as a score of 5 or 6 (correct).

## Supplemental Figure 2. Excerpt from the Word Cloud Derived from Codes Applied to Interview Transcripts

**Figure Legend:** The size of the codes represents the frequency in which they appeared throughout the 30 interview transcripts; the larger the size, the more often the code was used. ATLAS.ti software was used to generate the Word Cloud.

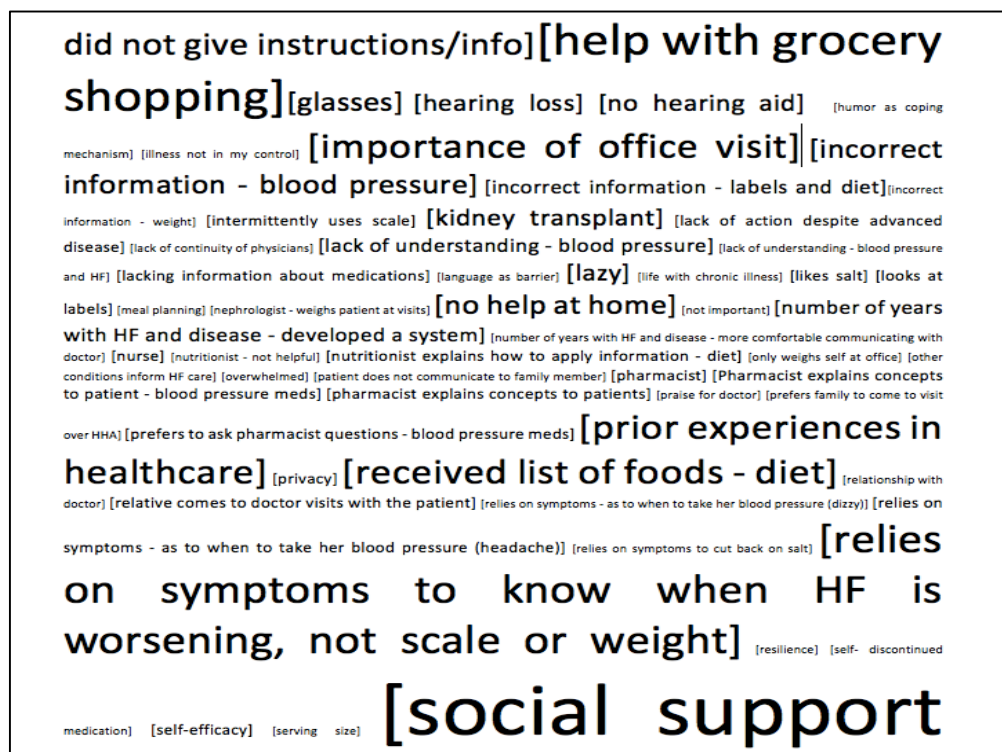

### Supplemental Figure 3. Initial Conceptual Framework

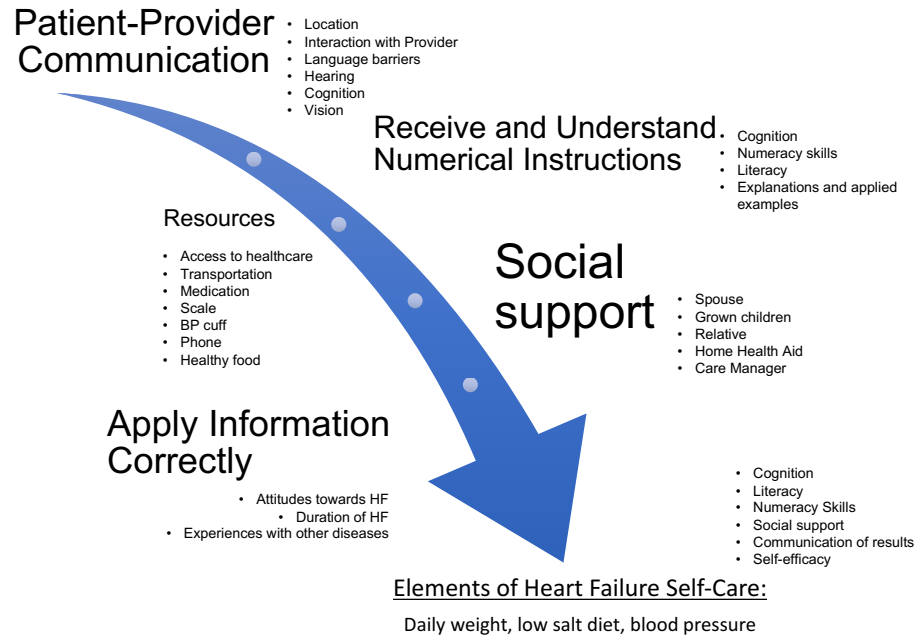

**Figure Legend:** This initial conceptual framework combines features of the word cloud with results from our grounded theory approach to represent the patient's perspective on numeracy across three domains of heart failure self-care: daily weight monitoring, maintaining a diet low in salt, and monitoring blood pressure.

## Appendix 1. Interview Topic Guide

### **Introduction:**

*“Thank you for speaking with me today.”*

*“The reason I am interviewing you is because I’m interested in understanding the role that numbers play in the management of Heart Failure.” “Particularly, I would like to understand how patients (like you) feel about receiving and using numerical information in the context of managing your disease.”*

*“What’s important for you to know is there are no right or wrong answers. I am recording this interview, but you should know that your answers will remain confidential nor will they affect your medical care here or anywhere else. Your healthcare provider will not receive information about this interview or your responses. At the end of the study, I plan to follow-up and share my findings with you.”*

### **Opening question(s):**

*“Tell me, how long you’ve been coming to WCIMA?”*

*“How long have you had HF?”*

### **Introductory statement:**

*“Since the purpose of this study is to assess how comfortable you are with numbers (in the context of your HF), I am going to give you 3 scenarios and ask you a few questions which pertain to each.*

*Again, there are no right and wrong answers. I simply am trying to understand your attitudes and beliefs towards numerical concepts and instructions that you may come across during visits with your doctor about HF. “*

*“The first scenario is about weight and water pills.”*

### **Scenario 1**

*“Patients with HF are often asked to weigh themselves every day at home in order to monitor the amount of fluid in their body.”*

(pause)

*“Doctors tell patients that if they weigh themselves and notice a weight gain of 2 to 3 pounds in 1 day or 5 pounds in 1 week, that is a problem and a sign of increased fluid in the body. When that occurs, they are often asked to take higher doses of their water pills.”*

(pause)

1  
2  
3  
4 Question 1: What do you understand about the numerical instructions?  
5

- 6 • Probe: Think back for a moment, has your doctor ever told you something like this?
- 7
- 8
- 9 • Probe: Think back to when you were in the hospital for HF, did doctors or nurses ever  
10 give you numerical instructions about monitoring your weight?  
11

12 Question 2: How does it feel to use a scale at home to monitor your weight?  
13

- 14 • Probe: When you step on a scale, what does the number mean to you?
- 15
- 16
- 17 • Probe: What is the first thing you think about if the number has changed?  
18
- 19
- 20 • Probe: In terms of your HF, what should you do when you see that your weight has  
21 increased?  
22
- 23 • Probe: Have you ever increased your water pill (or other medications) dose after noticing  
24 changes on the scale?  
25
- 26
- 27 • Probe: Other than a scale, are there other ways that you keep track of your weight (or  
28 fluids in your body)?  
29

30  
31 Question 3: How confident are you that you could follow these numerical instructions?  
32

- 33 • Probe: Why? Why not?
- 34
- 35
- 36 • Probe: Does monitoring your weight and adjusting your water pill doses feel like a  
37 difficult task to carry out?  
38
- 39
- 40 • Probe: Would you require help to do so?
- 41
- 42 • Probe: Is there anything that might make recording your weight or noticing a significant  
43 gain or loss easier?  
44

45 (pause)

46  
47 *“This next scenario I will read to you is about following a low salt diet.”*  
48

49  
50 (pause)

## 51 **Scenario 2**

52  
53 *Patients with HF need to limit the amount of salt (sodium) they eat in order to avoid fluid*  
54 *buildup. Often, they are asked to follow a low salt diet, which would allow you to eat up to*  
55 *3,000mg of salt per day.*  
56  
57  
58  
59  
60



(pause)

*Let's say you go to the deli for lunch and buy 1 bag of potato chips (which is 170mg of salt) and a can of chicken soup (which is 820 mg of salt).*

*At dinnertime, let's say you eat a hot dog (which is 470mg of salt).*

*Given your 3,000mg limit, would you be able to eat a second hot dog?*

(pause)

Question 1: What do you understand about what I just told you?

- Probe: Think back for a moment, has your doctor ever spoke to you about a low salt diet?
- Probe: Think back to when you were in the hospital for HF, did doctors or nurses ever give you numerical instructions about following a low salt diet?

Question 2: How does it feel to have to keep track of how much salt you eat each day?

- Probe: How comfortable are you the reading nutrition labels of the food you eat?
- Probe: What do you think about when you make food choices?
- Probe: What system do you use for deciding whether a food is salty?
- Probe: How does counting and adding the salt in each of the foods make you feel?

Question 3: How confident are you that you could follow these numerical instructions and maintain a low salt diet?

- Probe: Why? Why not?
- Probe: Does maintaining a low salt diet feel like a difficult task to carry out?
- Probe: Would you require help to do so?
- Probe: Is there anything that might make following a low salt diet easier?

*“The final scenario I will read to you is about blood pressure.”*

(pause)

### **Scenario 3:**

*Patients with HF often take medications for their blood pressure.*

*Doctors ask that patients with HF monitor their blood pressure at home with a blood pressure cuff and record it in a log.*

(pause)

*Yesterday, one of my patients called me because his blood pressure was 110/70. He thought the top number was too low and did not want to take his Coreg (also known as Carvedilol). I explained to him that if he felt well, it was OK to take the medication. I told him that patients with HF can tolerate lower blood pressures, but if the top number is less than 90mmHg or he is feeling lightheaded, he should not take his blood pressure medicine.*

(pause)

**Question 1:** What do you understand about the numerical instructions?

- **Probe:** Think back for a moment, has your doctor ever told you something like this?
- **Probe:** Think back to when you were in the hospital for HF, did doctors or nurses ever give you numerical instructions about monitoring your blood pressure?

**Question 2:** What do you understand about the two numbers in a blood pressure measurement?

- **Probe:** As best as you can, tell me what the top and bottom number means to you?
- **Probe:** If you had to pay closer attention to one, which is more important for your HF and your health? (top or bottom). Why?

**Question 2:** How does it feel to use a blood pressure cuff at home to monitor your blood pressure?

- **Probe:** When your blood pressure is taken (or when you take it), what does the number mean to you?
- **Probe:** What blood pressure might be considered too high?

- Probe: What blood pressure might be considered too low?
- What is the first thing you think about when you see (or are told) what your blood pressure is?
- Probe: In terms of your HF, what should you do when you see that the top number is too high? Too low?
- Probe: Have you ever altered your medication regimen in response to seeing your blood pressure?

Question 3: How confident are you that you could follow these numerical instructions about blood pressure?

- Probe: Why? Why not?
- Probe: Does monitoring your blood pressure at home feel like a difficult task to carry out?
- Probe: Would you require help to do so?
- Probe: Is there anything that might make recording your blood pressure easier?
- Probe: Is there anything that might make taking (or adjusting) your blood pressure medications easier?
- Probe: How comfortable are you calling your doctor when you are unsure of what to do?

**Ending question:**

*“I think what I heard today from you is \_\_\_\_\_, \_\_\_\_\_ and \_\_\_\_\_.”*

(pause)

*Over the next few weeks I will be interviewing other patients and will be sure to circle back to you at the end of the study to share my findings with you.*

*“Before we end today, is there anything you want to tell me that I didn’t ask you?”*

(pause)

**END**

The Consolidated criteria for reporting qualitative research (COREQ): a 32-item checklist for interviews and focus groups

| No. Item                                       | Guide questions/description                                                                                                                                                                                                                      | Considered |
|------------------------------------------------|--------------------------------------------------------------------------------------------------------------------------------------------------------------------------------------------------------------------------------------------------|------------|
| <b>Domain 1: Research team and reflexivity</b> |                                                                                                                                                                                                                                                  |            |
| <b>Personal Characteristics</b>                |                                                                                                                                                                                                                                                  |            |
| 1. Interviewer/facilitator                     | Which author/s conducted the interview or focus group? M.R.S., page 5                                                                                                                                                                            | Yes        |
| 2. Credentials                                 | What were the researcher's credentials? MD, MPH, page 1                                                                                                                                                                                          | Yes        |
| 3. Occupation                                  | What was their occupation at the time of the study? Physician-researcher, page 1                                                                                                                                                                 | Yes        |
| 4. Gender                                      | Was the researcher male or female? Female, page 1                                                                                                                                                                                                | Yes        |
| 5. Experience and training                     | What experience or training did the researcher have? M.R.S. is a AHRQ research fellow (qualitative training is mandatory), page 1; A.F.S. Trained in qualitative study coding; L.R. Qualitative expert; page 1                                   | Yes        |
| <b>Relationship with participants</b>          |                                                                                                                                                                                                                                                  |            |
| 6. Relationship established                    | Was a relationship established prior to study commencement? No Participants who were deemed eligible were approached to gauge interest in participating, page 5                                                                                  | No         |
| 7. Participant knowledge of the interviewer    | What did the participants know about the researcher? They her title, research experience, and motivation for doing the study (consent form), page 6                                                                                              | Yes        |
| 8. Interviewer characteristics                 | What characteristics were reported about the interviewer/facilitator? Title, research experience, and motivation for doing the study, page 6                                                                                                     | Yes        |
| <b>Domain 2: Study design</b>                  |                                                                                                                                                                                                                                                  |            |
| <b>Theoretical framework</b>                   |                                                                                                                                                                                                                                                  |            |
| 9. Methodological orientation and Theory       | What methodological orientation was stated to underpin the study? Grounded theory, page 6                                                                                                                                                        | Yes        |
| 10. Sampling                                   | How were participants selected? Purposive sampling, page 5                                                                                                                                                                                       | Yes        |
| 11. Method of approach                         | How were participants approached? Telephone, followed by face-to-face by A.F.S., page 5                                                                                                                                                          | Yes        |
| 12. Sample size                                | How many participants were in the study? 30, page 5                                                                                                                                                                                              | Yes        |
| 13. Non-participation                          | How many people refused to participate or dropped out? 42 (see study flow diagram for reasons), page 5 and supplemental figure.                                                                                                                  | Yes        |
| <b>Setting</b>                                 |                                                                                                                                                                                                                                                  |            |
| 14. Setting of data collection                 | Where was the data collected? Clinic, page 6                                                                                                                                                                                                     | Yes        |
| 15. Presence of non-participants               | Was anyone else present besides the participants and researchers? No, page N/A                                                                                                                                                                   | Yes        |
| 16. Description of sample                      | What are the important characteristics of the sample? Demographics (age, sex, race/ethnicity, education, insurance), clinical (HF duration, severity of HF, medications) and health system characteristics (provider type, utilization), page 6. | Yes        |
| <b>Data collection</b>                         |                                                                                                                                                                                                                                                  |            |

|                                        |                                                                                                                                                                                   |     |
|----------------------------------------|-----------------------------------------------------------------------------------------------------------------------------------------------------------------------------------|-----|
| 17. Interview guide                    | Were questions, prompts, guides provided by the authors? Was it pilot tested? Yes (topic guide available with questions and prompts), Yes, it was pilot tested, page 5 and page 7 | Yes |
| 18. Repeat interviews                  | Were repeat interviews carried out? If yes, how many? No                                                                                                                          | N/A |
| 19. Audio/visual recording             | Did the research use audio or visual recording to collect the data? Interviews were audio-recorded, page 6                                                                        | Yes |
| 20. Field notes                        | Were field notes made during and/or after the interview or focus group? Yes, no page                                                                                              | Yes |
| 21. Duration                           | What was the duration of the inter views or focus group? 20- 40 minutes, page 5                                                                                                   | Yes |
| 22. Data saturation                    | Was data saturation discussed? Yes, it was reached at 17 participants, page 5                                                                                                     | Yes |
| 23. Transcripts returned               | Were transcripts returned to participants for comment and/or correction? Main results were shared with participants for feedback but not transcripts, page 7                      | Yes |
| <b>Domain 3: Analysis and findings</b> |                                                                                                                                                                                   |     |
| <b>Data analysis</b>                   |                                                                                                                                                                                   |     |
| 24. Number of data coders              | How many data coders coded the data? Three, page 6                                                                                                                                | Yes |
| 25. Description of the coding tree     | Did authors provide a description of the coding tree? No                                                                                                                          | No  |
| 26. Derivation of themes               | Were themes identified in advance or derived from the data? Derived from the data, page 6.                                                                                        | Yes |
| 27. Software                           | What software, if applicable, was used to manage the data? ATLAS.Ti, page 6                                                                                                       | Yes |
| 28. Participant checking               | Did participants provide feedback on the findings? Yes, feedback was received from study participants, page 7                                                                     | Yes |
| <b>Reporting</b>                       |                                                                                                                                                                                   |     |
| 29. Quotations presented               | Were participant quotations presented to illustrate the themes/findings? Was each quotation identified? Yes, by participant ID number – pages 8 - 14                              | Yes |
| 30. Data and findings consistent       | Was there consistency between the data presented and the findings? Yes                                                                                                            | Yes |
| 31. Clarity of major themes            | Were major themes clearly presented in the findings? Yes, page 7 - 14                                                                                                             | Yes |
| 32. Clarity of minor themes            | Is there a description of diverse cases or discussion of minor themes? Yes                                                                                                        | Yes |
