# Supplementary material for: Let’s talk numbers: a qualitative study of community-dwelling US adults to understand the role of numeracy in the management of heart failure
Source: PubMed Central journal article supplement — BMJ Open. 2018 Sep 19;8(9):e023073. doi: 10.1136/bmjopen-2018-023073 (PMC6150136; doi:10.1136/bmjopen-2018-023073), 2018-09-19
Supplement: bmjopen-2018-023073supp002.pdf [file bmjopen-2018-023073supp002.pdf]

## Supplemental Figure 1. Study Flow Diagram

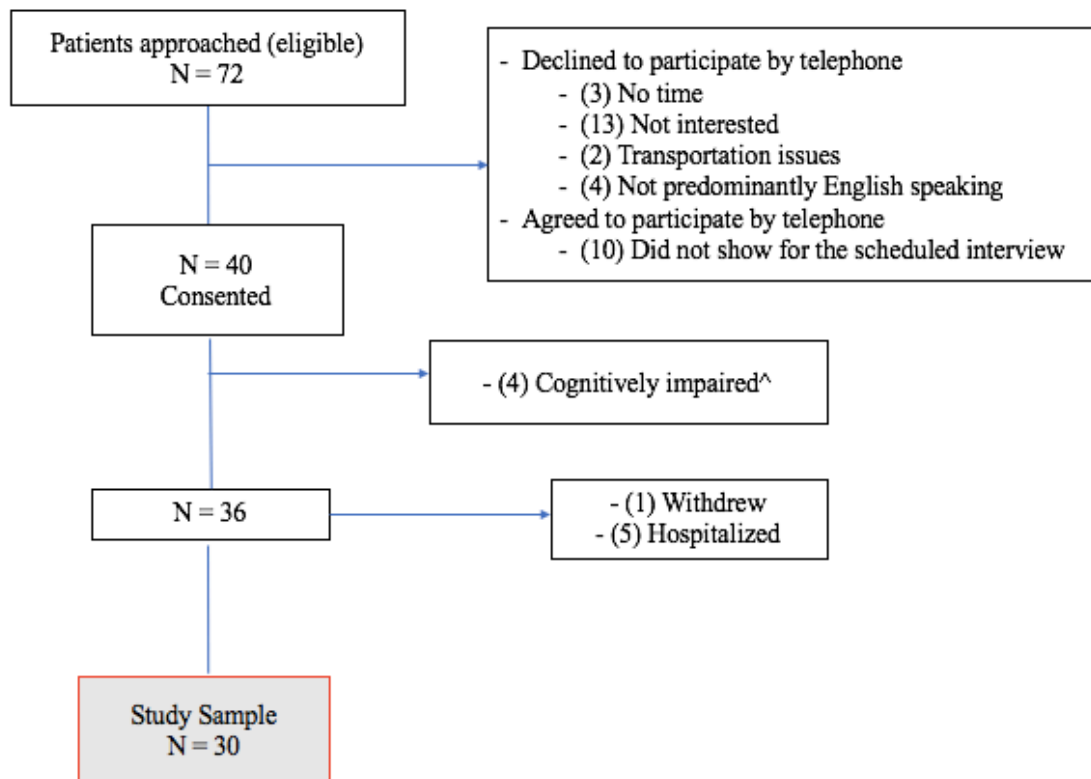

**Figure Legend:** Overview of study population. ^Cognitive impairment was assessed using the Six Item Screener by Callahan et al (2002), a well validated instrument which assesses global cognitive impairment. Cognitive impairment was defined as a score of 0 – 4 (correct) and intact cognitive function was defined as a score of 5 or 6 (correct).

## Supplemental Figure 2. Excerpt from the Word Cloud Derived from Codes Applied to Interview Transcripts

**Figure Legend:** The size of the codes represents the frequency in which they appeared throughout the 30 interview transcripts; the larger the size, the more often the code was used. ATLAS.ti software was used to generate the Word Cloud.

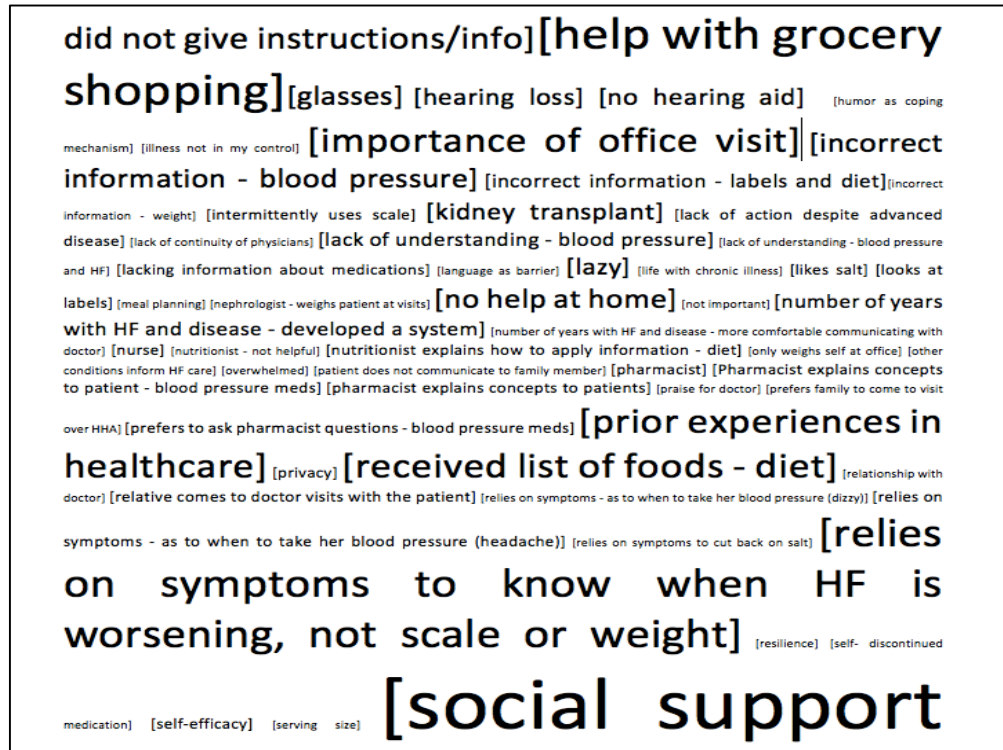

### Supplemental Figure 3. Initial Conceptual Framework

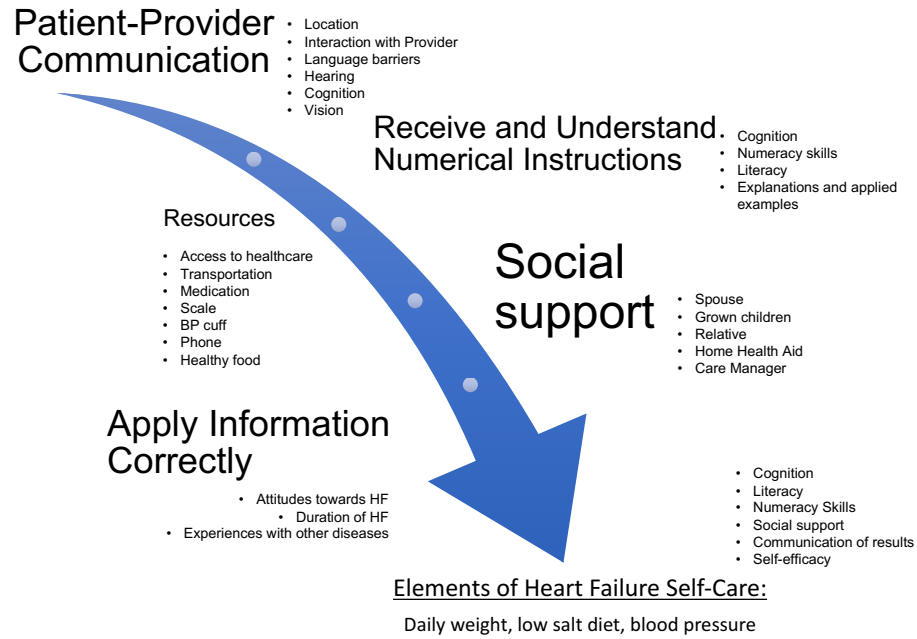

**Figure Legend:** This initial conceptual framework combines features of the word cloud with results from our grounded theory approach to represent the patient’s perspective on numeracy across three domains of heart failure self-care: daily weight monitoring, maintaining a diet low in salt, and monitoring blood pressure.
